# Supplementary material for: Self-collected gargle as a patient-friendly sample collection method for COVID-19 diagnosis in population context
Source: Research Square preprint supplement (doi:10.21203/rs.3.rs-764442/v1), 2021-08-04
Supplement: Supplementary file 1 [file 44c83e99ee0d045f220109e8.xlsx]

## Sheet: Demographics
		Inpatients							Outpatients
		Uninfected	Infected						Uninfected	Infected
			NPOP + Gargle Positive		NPOP Only Positive		Gargle Only Positive			NPOP + Gargle Positive		NPOP Only Positive		Gargle Only Positive
Ct Values	Swab (mean ± SD)	-	24.59 ± 6.68	26.66 ± 6.63	32.39 ± 2.72	34.23 ± 2.38	-	-	-	20.13 ± 4.88	21.79 ± 4.87	32.39 ± 3.40	33.98 ± 3.39	-	-
	Gargle (mean ± SD)	-	30.67 ± 4.91	31.55 ± 4.65	-	-	35.07 ± 1.64	34.18 ± 1.96	-	29.01 ± 4.77	29.70 ± 4.73	-	-	34.83 ± 2.28	35.69 ± 1.58
Total (n, %)		16 (5.16%)	41 (13.23%)		6 (1.94%)		3 (0.97%)		85 (27.42%)	126 (40.65%)		22 (7.10%)		11 (3.55%)
Age (mean ± SD)		32.44 ± 13.55	51.13 ± 14.49		51 ± 15.57		27.33 ± 4.51		33.4 ± 12.96	35.94 ± 13.08		32 ± 13.79		29.82 ± 7.39
Age Groups (n, %)	<18	0 (0%)	0 (0%)		0 (0%)		0 (0%)		1 (1.18%)	2 (1.59%)		3 (13.64%)		1 (9.09%)
	18-30	10 (62.50%)	4 (9.76%)		1 (16.67%)		2 (66.67%)		41 (48.24%)	57 (45.24%)		8 (36.36%)		6 (54.55%)
	31-40	3 (18.75%)	7 (17.07%)		1 (16.67%)		1 (33.34%)		28 (32.94%)	32 (25.40%)		5 (22.73%)		3 (27.27%)
	41-50	0 (0%)	5 (12.20%)		2 (33.33%)		0 (0%)		4 (4.71%)	18 (14.29%)		4 (18.18%)		1 (9.09%)
	51-60	2 (12.50%)	12 (29.27%)		2 (33.33%)		0 (0%)		7 (8.24%)	10 (7.94%)		1 (4.55%)		0 (0%)
	>60	1 (6.25%)	13 (31.71%)		0 (0%)		0 (0%)		4 (4.71%)	7 (5.56%)		1 (4.55%)		0 (0%)
Gender (n, %)	F	8 (50%)	25 (60.98%)		5 (83.33%)		3 (100%)		28 (49.12%)	59 (46.83%)		8 (36.36%)		5 (45.45%)
	M	8 (50%)	16 (39.02%)		1 (16.67%)		0 (0%)		57 (50.88%)	67 (53.17%)		14 (63.64%)		6 (54.55%)
Symptoms	No of Symptoms (mean ± SD)	1.69 ± 2.5	4.85 ± 2.43		5 ± 1.79		3.67 ± 2.08		1.33 ± 1.61	3.06 ± 2.09		2.05 ± 1.94		1.64 ± 1.96
	Asymptomatic (n, %)	9 (56.25%)	2 (4%)						37 (43.54%)	18 (11.32%)
Comorbidities (n, %)	Hypertension	1 (6.25%)	13 (26%)						0 (0%)	4 (2.52%)
	Chronic Heart Diseases	1 (6.25%)	11 (22%)						1 (1.18%)	2 (1.26%)
	Chronic Lung Diseases	0 (0%)	0 (0%)						2 (2.35%)	2 (1.26%)
	Chronic Liver Diseases	0 (0%)	3 (6%)						0 (0%)	0 (0%)
	Diabetes Mellitus	0 (0%)	3 (6%)						0 (0%)	5 (3.14%)

## Sheet: Age
Demographics
	Gender	No of Participants	Percentage		Age Groups	RSND	%	RSDK	%	Total
RSND	Male	61	0.393548		<18	6	0.0387097	1	0.00645161	7	0.0225806
	Female	94	0.606452		18-30	65	0.419355	63	0.406452	128	0.412903
RSDK	Male	64	0.412903		31-40	32	0.206452	48	0.309677	80	0.258065
	Female	91	0.587097		41-50	20	0.129032	14	0.0903226	34	0.109677
Total	Male	125	0.403226		51-60	20	0.129032	14	0.0903226	34	0.109677
	Female	185	0.596774		>60	12	0.0774194	15	0.0967742	27	0.0870968

## Sheet: Preferences
	Hospital	Cohort	Preferences
			NPOP Swab	Gargle
	RSND	Inpatients	2	33
		Outpatients	7	113
	RSDK	Inpatients	0	31
		Outpatients	0	124
	Total		9	301
	Percentage		0.0290323	0.970968

## Sheet: Complete
Hospital - Cohort	Previous Diagnosis	Samples Code	NP-OP				Saliva				Both
			FAM	HEX	Cy5	Positive?	FAM	HEX	Cy5	Positive?			Contingency Table
RSDK - Inpatients	Positive	C850399	19.71	21.35	3.81	1	30.94	31.47	23.9	1	1		NPOP	Gargle		Total	k-coefficient		Effect size	Value	95% CI
	Positive	C458228	33.84	34.51	24.15	1	30.84	30.53	23.75	1	1			Pos	Neg				Sensitivity	0.8564	80.03% to 89.87%
	Positive	C851260	-	-	29.33	0	36.51	34.47	23.86	1	0		Pos	167	28	195	0.717		Specificity	0.8783	80.60% to 92.61%
	Positive	C076938	17.71	18.94	26.78	1	24.95	25.93	25.24	1	1		Neg	14	101	115			Positive Predictive Value	0.9227	87.44% to 95.34%
	Positive	C831634	12.46	12.87	26.74	1	19.34	19.67	21.77	1	1		Total	181	129	310			Negative Predictive Value	0.7829	70.42% to 84.53%
	Positive	C850742	33.89	35.82	24.82	1	35.07	33.55	19.84	1	1
	Positive	C844490	14.3	15.86	27.22	1	25.26	25.72	22.07	1	1
	Positive	C849449	-	-	25.97	0	33.28	32.3	25	1	0		NPOP Swab_Concordance to prev result
	Positive	C214035	21.38	22.47	25.57	1	30.31	31.63	23.33	1	1		Previous Results	NPOP			k-coefficient		Effect size	Value	95% CI
	Positive	C852242	21.46	22.58	21.46	1	27.28	28.73	28.54	1	1			Positive	Negative	Total			Sensitivity	0.8868	77.42% to 94.71%
	Positive	C850599	13.37	13.46	21.89	1	20.74	21.35	23.44	1	1		Positive	47	6	53	0.755		Specificity	1	77.19% to 100%
	Positive	C852161	16.41	18.49	29.09	1	22.52	24.92	22.47	1	1		Negative	0	13	13			Positive Predictive Value	1	92.44% to 100%
	Positive	C124311	19.63	21.89	28	1	23.92	23.76	28.74	1	1		Total	47	19	66			Negative Predictive Value	0.6842	46.01% to 84.64%
	Positive	C851363	21.78	23.97	28.37	1	34.37	35.92	21.59	1	1
	Positive	C854095	-	-	29.19	0	-	-	25.23	0	0
	Positive	C854266	23.86	26.34	30.48	1	35.87	37.24	23.76	1	1		Gargle_Concordance to prev result
	Negative	C853860	-	-	28.74	0	-	-	23.56	0	0		Previous Results	Gargle		Total	k-coefficient		Effect size	Value	95% CI
	Positive	B065366	31.36	33.56	25.86	1	-	-	21.75	0	0			Positive	Negative				Sensitivity	0.8302	70.77% to 90.80%
	Positive	C498381	29.92	32.32	25.85	1	-	-	23.44	0	0		Positive	44	9	53	0.658		Specificity	1	77.19% to 100%
	Positive	C854070	22.52	24.94	24.61	1	32.84	38.34	24.76	1	1		Negative	0	13	13			Positive Predictive Value	1	91.97% to 100%
	Positive	C854422	27.56	30.19	22.92	1	29.27	31.85	19.38	1	1		Total	44	22	66			Negative Predictive Value	0.5909	38.73% to 76.74%
	Positive	C853541	-	-	23.64	0	-	-	20.31	0	0
	Positive	C851377	29.79	30.78	28.13	1	35.76	-	27.16	1	1
	Negative	C854992	-	-	23.56	0	-	-	20.02	0	0
	Negative	C846273	-	-	27.88	0	-	-	22.99	0	0
	Negative	C854025	-	-	22.39	0	-	-	26.35	0	0
	Positive	C851471	15.64	17.62	26.86	1	33.57	-	28.3	1	1
	Positive	C855182	16.64	18.46	23.98	1	28.27	28.98	22.92	1	1
	Positive	C854992	19.53	21.45	27.2	1	30.51	30.89	25.93	1	1
	Positive	C551166	17.78	19.55	26.9	1	24.79	25.7	25.25	1	1
	Positive	C304674	27.74	29.61	27.58	1	32.38	33.46	26.59	1	1
RSDK - Outpatients	N.A.	C740899	34.57	34.6	28.84	1	-	-	20.43	0	0
		C676995	-	-	29.96	0	-	-	28.88	0	0
		C693800	-	-	29.44	0	-	-	23.54	0	0
		C830957	20.36	21.26	26.57	1	28.7	29.33	19.74	1	1
		C693714	-	-	28.92	0	-	-	24.4	0	0
		C583838	-	-	26.46	0	-	-	21.94	0	0
		C798443	15.65	16.7	27.78	1	26.33	26.77	21.7	1	1
		C523456	-	-	27.2	0	-	-	22.37	0	0
		C750918	18.89	19.96	30.23	1	24.48	25.43	21.72	1	1
		C242123	-	-	27.78	0	-	-	21.29	0	0
		C242123	-	-	26.14	0	-	-	22.47	0	0
		C750407	14.79	15.51	25.36	1	24.59	25.35	19.85	1	1
		C537261	17.71	18.57	29.95	1	26.7	27.26	20.7	1	1
		BS	15.46	16.29	25.71	1	16.32	16.63	19.57	1	1
		C750404	16.68	17.48	27.96	1	18.77	18.36	21.25	1	1
		C861668	20.98	21.95	27.23	1	30.53	32.38	19.86	1	1
		C438761	22.47	23.36	26.43	1	29.38	29.92	20.97	1	1
		C660265	16.95	17.72	27.03	1	26.37	25.78	20.69	1	1
		C323911	-	-	27.38	0	-	-	22.61	0	0
		AKF	-	-	25.35	0	-	-	23.51	0	0
		ER	-	-	29.18	0	-	-	21.78	0	0
		STO	24.81	25.46	25.81	1	33.76	32.1	20.4	1	1
		C862086	-	-	22.49	0	34.9	37.76	18.08	1	0
		C693687	17.34	18.77	26.91	1	31.38	30.55	20.97	1	1
		C810214	14.8	15.69	25.12	1	31.54	30.74	23.83	1	1
		SPA	15.58	16.47	29.35	1	18.96	19.69	19.77	1	1
		NK	22.81	23.76	27.55	1	34.62	35.48	21.53	1	1
		C664525	-	-	25.9	0	-	-	21.96	0	0
		DMS	22.56	23.43	27.95	1	32.97	32.83	21.58	1	1
		MW	23.25	23.99	28.33	1	31.8	32.58	20.87	1	1
		FAR	29.61	30.42	26.74	1	32.59	31.67	21.3	1	1
		B405344	-	-	28.83	0	-	-	19.92	0	0
		C664522	-	-	28.74	0	-	-	22.42	0	0
		SFY	-	-	28.45	0	-	-	24.87	0	0
		MSN	-	-	24.7	0	-	-	21.98	0	0
		C861275	20.72	21.62	25.89	1	25.75	26.46	18.92	1	1
		C628384	-	-	28.69	0	-	-	22.82	0	0
		EWH	19.44	19.93	24.72	1	30.72	30.65	21.85	1	1
		JWT	23.9	24.62	28.4	1	27.33	27.91	22.79	1	1
		C740697	25.49	25.64	27.17	1	-	-	21.69	0	0
		C860462	-	-	25.58	0	-	-	20.49	0	0
		C693815	-	-	30.59	0	-	-	23.46	0	0
		C845534	24.84	25.97	26.77	1	32.88	30.77	21.9	1	1
		FND	-	-	28.76	0	-	-	27.67	0	0
		C725280	23.96	25.76	21.69	1	35.91	33.4	23.34	1	1
		C727768	19.54	21.58	29.14	1	32.98	32.93	27.46	1	1
		C690256	17.64	19.47	26.65	1	31.82	32.15	20.78	1	1
		C671095	29.81	34.95	29.49	1	-	-	22.16	0	0
		C662083	15.4	17.24	25	1	27.63	29.28	21.93	1	1
		C499097	22.29	22.51	29.94	1	25.45	25.92	20.19	1	1
		THW	14.92	16.75	28.72	1	26.73	28.38	20.42	1	1
		C723256	16.77	19.35	31.44	1	24.89	26.87	25.27	1	1
		C911365	18.44	20.6	29.92	1	34.6	34.31	24.97	1	1
		C899212	20.21	22.69	26.6	1	32.97	34.48	25.1	1	1
		C661175	17.67	19.54	29.81	1	32.51	33.31	23.43	1	1
		EIA	18.2	20.1	28.88	1	30.8	30.47	21.81	1	1
		C742502	15.99	18.13	28.96	1	31.89	31.7	21.5	1	1
		FA	-	-	26.89	0	-	-	21.67	0	0
		C565531	16.85	19.4	30.42	1	28.9	22.12	20.55	1	1
		C451706	23.13	25.71	30.32	1	31.69	31.79	26.54	1	1
		C744295	14.34	16.24	25.83	1	28.13	27.98	23.57	1	1
		C783022	-	36.79	27.96	1	33.85	34.95	29.13	1	1
		C842336	31.33	34.61	27.77	1	-	-	23.63	0	0
		C355267	18.39	20.5	27.8	1	30.53	30.13	29.04	1	1
		C629145	19.2	20.9	26.19	1	32.45	32.36	24.14	1	1
		C660256	25.93	28.9	28.66	1	30.9	31.58	19.76	1	1
		RI	24.44	26.91	30.75	1	29.93	31.72	25.28	1	1
		ESH	-	-	28.75	0	30.51	32.73	22.89	1	0
		THI	33.9	-	27.19	1	-	-	20.25	0	0
		C659677	26.57	28.97	26.77	1	-	-	20.78	0	0
		C628378	16.73	18.99	25.99	1	28.54	29.34	24.13	1	1
		C121058	26.38	28.86	30.77	1	30.49	32.27	25.35	1	1
		C898338	32.51	36.75	28.92	1	-	-	24.53	0	0
		C718238	22.75	25.37	25.81	1	34.4	39.12	22.21	1	1
		C520836	34.52	37.2	27.94	1	-	-	25.2	0	0
		C867874	23.63	25.8	26.95	1	32.33	32.7	19.83	1	1
		C486638	24.71	26.71	24.71	1	34.83	34.35	22.64	1	1
		C324222	14.78	16.99	30.92	1	22.99	23.74	23.97	1	1
		C401155	21.62	23.91	27.97	1	34.81	35.34	22.46	1	1
		C719835	25.58	27.76	27.98	1	32.94	39.26	20.93	1	1
		C481658	17.64	20.27	29.05	1	24.54	24.45	20.39	1	1
		C166638	15.93	18.16	25.42	1	21.4	21.37	17.68	1	1
		C086946	17.93	20.52	28.49	1	26.76	28.63	24.31	1	1
		C378220	22.98	25.5	27.17	1	33.99	36.43	26.84	1	1
		MRW	16.31	18.8	23.65	1	30.86	32.91	30.02	1	1
		C65938	24.48	27.18	29.34	1	30.75	31.22	25.74	1	1
		C848253	21.38	23.92	27.27	1	34.35	34.6	20.66	1	1
		B288516	22.9	25.39	27.89	1	24.95	26.44	22.32	1	1
		C868152	27.45	30.46	29.56	1	31.49	32.52	20.19	1	1
		C006453	23.85	26.91	30.18	1	31.23	31.75	24.18	1	1
		C608122	15.86	17.81	23.79	1	25.68	26.37	24.28	1	1
		C578746	26.34	28.83	26.49	1	32.83	34.75	21.09	1	1
		C649481	21.58	23.49	27.1	1	32.74	32.73	20.16	1	1
		C668290	16.46	18.57	28.21	1	29.5	29.32	21.78	1	1
		C668352	-	-	20.65	0	-	-	20.58	0	0
		C782902	19.7	22.21	20.11	1	28.66	29.6	21.3	1	1
		C628335	18.54	20.94	28.87	1	27.89	25.92	20.19	1	1
		C525483	36.82	36.92	31.1	1	-	-	22.59	0	0
		C482262	26.69	28.76	27.19	1	29.67	29.54	23.45	1	1
		C591916	18.54	20.94	28.87	1	27.89	30.27	18.48	1	1
		C386681	16.58	18.7	31.81	1	33.47	33.39	21.13	1	1
		C846883	21.78	24.5	28.16	1	20.64	21.23	18.09	1	1
		C665454	14.7	17.15	29.65	1	27.4	27.44	21.27	1	1
		C481625	25.16	27.92	28.06	1	32.85	32.79	21.25	1	1
		C404021	30.93	33.94	26.62	1	-	-	21.95	0	0
		C525470	25.38	27.59	27.18	1	31.83	32.58	23.34	1	1
		C859267	19.65	21.74	26.83	1	23.5	24.28	23.72	1	1
		C610553	-	-	31.08	0	-	-	23.25	0	0
		C669980	28.75	29.42	28.59	1	-	-	25.72	0	0
		C872011	29.87	30.88	24.7	1	-	-	20.88	0	0
		B018178	30.81	30.8	25.27	1	31.85	30.93	21.21	1	1
		C872022	27.63	27.73	27.41	1	37.74	33.77	23.71	1	1
		C871995	34.6	33.31	29.31	1	35.69	37.76	20.67	1	1
		C871995	14.36	13.91	24.22	1	25.97	25.29	23.55	1	1
		C566165	17.38	17.55	21.95	1	25.67	25.46	22.79	1	1
		C874192	-	-	28.25	0	-	-	26.2	0	0
		C814857	32.45	32.51	24.37	1	37.3	33.55	23.27	1	1
		C414669	14.63	14.6	26.91	1	24.61	23.81	27.91	1	1
		C865823	16.94	17.67	22.6	1	25.75	25.44	24.41	1	1
		C386009	-	-	25.39	0	-	-	22.23	0	0
		C525452	15.68	16.34	26.48	1	33.83	31.88	24.33	1	1
		C681871	16.51	16.98	23.32	1	21.61	20.86	23.69	1	1
		C481656	16.7	17.42	23.4	1	35.25	37.86	20.65	1	1
		C874705	-	-	21.98	0	-	-	23.44	0	0
RSND - Inpatients	Positive	A-001	28.17	30.15	23.85	1	36.52	35.96	23.04	1	1
	Positive	A-002	33.61	35.07	25.1	1	35.44	-	23.2	1	1
	Positive	A-003	36.6	-		1	35.42	36.05	22.57	1	1
	Positive	A-004	25.95	28	23.41	1	-	35.83	18.74	1	1
	Positive	A-005	-	37.08	27.83	1	-	34.07	23.67	1	1
	Positive	A-006	21.67	23.68	26.22	1	35.36	35.18	22.33	1	1
	Positive	A-007	27.74	29.64	27.52	1	33.67	34.58	21.18	1	1
	Positive	A-008	28.6	29.5	28.17	1	24.5	27.66	22.37	1	1
	Positive	A-009	33	35.32	23.85	1	-	36.02	21.38	1	1
	Positive	A-010	25.17	26.91	25.21	1	35.35	33	22.13	1	1
	Positive	A-011	32.07	33.92	25.54	1	35.19	34.25	21.58	1	1
	Positive	A-012	33	33.68	26.61	1	33.22	33.11	20.69	1	1
	Positive	A-013	26.41	27.52	24.37	1	33.2	35.14	21.18	1	1
	Positive	A-014	-	-	22.09	0	35.41	36.22	23.04	1	0
	Positive	A-015	-	-	24.87	0	-	-	23.85	0	0
	Positive	A-016	36.72	37.13	26.11	1	35.04	35.32	22.14	1	1
	Positive	A-017	36.7	37.48	22.37	1	-	-	20.95	0	0
	Positive	A-018	27.84	29.28	24.71	1	36.57	-	20.57	1	1
	Positive	A-019	17.57	18.51	23.97	1	36.17	35.36	19.79	1	1
	Positive	A-020	29.69	31.51	24.88	1	-	-	23.75	0	0
	Positive	A-021	24.79	25.58	24.11	1	28.67	30.72	21.15	1	1
	Positive	A-022	34.4	36.72	27.08	1	-	-	25.83	0	0
	Positive	A-023	32.29	34.48	25.73	1	-	-	22.07	0	0
	Positive	A-024	20.7	22.9	25.8	1	25.5	26.4	24.2	1	1
	Positive	A-025	27.09	28.37	27.88	1	26.65	28.93	21.76	1	1
	Positive	A-026	29.75	30.83	26.01	1	29.66	30.99	25.47	1	1
	Negative	B-001	-	-	25.16	0	-	-	23.1	0	0
	Negative	B-002	-	-	25.48	0	-	-	20.95	0	0
	Negative	B-003	-	-	26.64	0	-	-	25.61	0	0
	Negative	B-004	-	-	27.18	0	-	-	21.18	0	0
	Negative	B-005	-	-	23.25	0	-	-	20.59	0	0
	Negative	B-006	-	-	25.6	0	-	-	21.21	0	0
	Negative	B-007	-	-	20.92	0	-	-	20.33	0	0
	Negative	B-008	-	-	22.98	0	-	-	18.96	0	0
	Negative	B-009	-	-	25.2	0	-	-	25.78	0	0
RSND - Outpatients	N.A.	G-101	-	-	25.16	0	-	-	22.67	0	0
		G-120	31.9	32.94	25.98	1	-	-	22.45	0	0
		G-145	19.39	20.47	23.87	1	23.01	25.47	23.8	1	1
		G-192	-	-	24.44	0	-	-	22.13	0	0
		G-103	17.25	19.04	24.08	1	32.66	34.04	24.7	1	1
		G-123	16.65	18.41	21.24	1	27.33	30.04	21.25	1	1
		G-146	31.86	33.89	21.4	1	-	-	21.53	0	0
		G-169	20.25	21.68	22.49	1	35.84	36.35	22.26	1	1
		G-195	19.4	21.03	23.58	1	30.34	32.54	21.56	1	1
		G-106	17.3	18.6	26.6	1	22.3	24.05	24.24	1	1
		G-125	37.6	-	25.8	1	-	-	23.4	0	0
		G-149	19.3	20.8	24.2	1	28.94	30.9	23.84	1	1
		G-170	17.7	20.2	23.9	1	32.82	35.96	21.23	1	1
		G-196	-	-	30.3	0	-	-	27.3	0	0
		G-129	27.7	30.5	28.4	1	31.1	32.8	22.9	1	1
		G-150	-	-	26.7	0	-	-	24.6	0	0
		G-174	-	-	28.5	0	-	-	23.3	0	0
		G-197	-	-	26.9	0	36.7	-	25.2	1	0
		G-109	19.6	22.3	28.5	1	26.4	28.4	24.6	1	1
		G-130	34.7	36	24.2	1	-	-	24.1	0	0
		G-151	14.5	16.7	27.3	1	16.5	18.1	24.7	1	1
		G-177	-	-	28.8	0	-	-	25.4	0	0
		G-110	-	-	26.8	0	-	-	23.5	0	0
		G-131	-	-	28.3	0	-	-	22.7	0	0
		G-155	-	-	25.3	0	-	-	24.5	0	0
		G-178	31.5	32.6	24	1	-	-	24.9	0	0
		G-112	-	-	29.6	0	-	-	25.6	0	0
		G-133	30.4	32.6	28.5	1	29.5	31	23.2	1	1
		G-160	21.4	23.6	29.8	1	27.2	29.4	27.5	1	1
		G-307	-	-	27.4	0	-	-	25.65	0	0
		G-349	-	-	24.9	0	-	-	23.9	0	0
		G-384	-	-	26.8	0	-	-	23.4	0	0
		G-427	-	-	26.2	0	-	-	25.9	0	0
		G-476	-	37.1	25.6	1	-	-	26.8	0	0
		G-309	-	-	26	0	-	-	28.68	0	0
		G-353	-	-	26.2	0	-	-	23.4	0	0
		G-400	-	37.4	26.2	1	-	-	23.6	0	0
		G-429	-	-	26.6	0	-	-	24.9	0	0
		G-481	-	-	26.5	0	-	-	22.9	0	0
		G-317	-	-	26.1	0	-	-	21.8	0	0
		G-354	-	-	25.6	0	-	-	22	0	0
		G-405	14.2	16.1	21.6	1	26.4	30.7	21.1	1	1
		G-445	-	-	27	0	-	-	21.1	0	0
		G-496	14.6	17.1	23.6	1	26.2	29.3	20.3	1	1
		G-329	-	-	23.2	0	-	-	20.8	0	0
		G-355	26.9	29.3	27	1	30.5	32.8	24.2	1	1
		G-407	18.9	21.2	24.3	1	26.8	28.8	23.8	1	1
		G-449	18.9	21	23	1	29.3	30.8	28.2	1	1
		G-500	27.3	27.7	26.4	1	23.8	26.5	25.1	1	1
		G-330	18.3	20.5	27.1	1	30.4	32	25.2	1	1
		G-107	18.4	22.4	28.3	1	24.3	26.7	21.6	1	1
		G-362	-	-	26.82	0	-	-	23.85	0	0
		G-410	-	-	24.88	0	-	-	21.93	0	0
		G-454	18.07	19.18	22.93	1	30.07	31.2	21.29	1	1
		G-334	17.57	18.79	22.8	1	26.71	27.91	20.87	1	1
		G-371	-	-	27.53	0	-	-	21.82	0	0
		G-417	22.12	23.5	23.02	1	31.93	33.73	25.07	1	1
		G-455	-	-	23.43	0	-	-	21.09	0	0
		G-337	21.58	22.51	24.28	1	25.54	26.58	20.35	1	1
		G-376	19.75	20.73	23.08	1	30.86	31.79	20.25	1	1
		G-421	-	-	23.5	0	-	-	22.33	0	0
		G-463	36.33	-	26.72	1	-	-	22.37	0	0
		G-524	-	-	22.82	0	-	-	25.85	0	0
		G-596	-	-	23.81	0	-	-	23.87	0	0
		G-666	-	-	22.57	0	-	-	24.86	0	0
		G-729	14.81	16.48	24.64	1	22.56	24.92	22.5	1	1
		G-777	13.54	15.17	23.39	1	29.28	31.63	27.46	1	1
		G-526	18.57	20.43	22.95	1	30.23	33.38	21.23	1	1
		G-599	-	-	22.46	0	-	-	24.25	0	0
		G-670	-	-	24	0	-	-	22.23	0	0
		G-730	18.62	20.86	22.38	1	36.42	-	21.97	1	1
		G-779	-	-	25.07	0	-	-	21.48	0	0
		G-539	-	37.09	25.8	1	-	-	24.24	0	0
		G-600	-	-	23.68	0	-	-	21.45	0	0
		G-671	-	-	26.3	0	-	-	21.8	0	0
		G-738	-	-	28.4	0	-	-	28.9	0	0
		G-786	-	-	26.2	0	-	-	24.5	0	0
		G-540	-	-	29.8	0	-	-	23.7	0	0
		G-607	-	-	25.8	0	-	-	27.7	0	0
		G-678	-	-	23.8	0	-	-	22.1	0	0
		G-752	-	-	29.1	0	-	-	23.3	0	0
		G-792	-	-	27.6	0	-	-	23.4	0	0
		G-565	-	-	25.3	0	-	-	24.5	0	0
		G-613	-	-	27.8	0	-	-	24.3	0	0
		G-695	-	-	22.63	0	-	37.09	20.57	1	0
		G-757	-	-	23.97	0	-	-	27.38	0	0
		G-576	-	-	22.48	0	-	-	24.31	0	0
		G-616	15.45	17.04	21.53	1	22.02	23.92	26.37	1	1
		G-706	17.63	18.97	22.79	1	30.01	31.7	26.54	1	1
		G-710	-	-	28.49	0	-	-	25.58	0	0
		G-583	-	-	27.33	0	-	-	20.69	0	0
		G-619	-	-	23.78	0	-	-	21.04	0	0
		G-593	15.64	17.49	23.03	1	22.79	24.83	28.54	1	1
		G-626	-	-	26.66	0	-	-	21.72	0	0
		G-628	-	-	27.06	0	-	-	20.3	0	0
		G-721	13.28	15.16	26.82	1	30.09	32.37	26.72	1	1
		G-773	-	-	26.08	0	-	37.36	25.7	1	0
		G-424	12.04	13.98	26.57	1	12.9	14.86	21.07	1	1
		G-871	35.44	37.08	26.07	1	36.05	-	25.62	1	1
		G-182	-	-	26.53	0	-	-	22.41	0	0
		G-116	-	-	23.69	0	-	-	25.27	0	0
		G-162	36.47	36.75	26.3	1	-	-	28.27	0	0
		G-184	-	-	27.09	0	-	-	26.23	0	0
		G-119	-	-	26.47	0	-	-	24.41	0	0
		G-138	18.93	19.84	25.01	1	18.47	20.85	23.1	1	1
		G-166	-	-	31.17	0	-	-	29.98	0	0
		G-187	-	-	27.16	0	-	-	23.85	0	0
		G-002	-	-	25.4	0	35.51	35.17	26.3	1	0
		G-003	-	-	30.5	0	-	-	28.3	0	0
		G-004	-	-	24.7	0	-	36.9	23.8	1	0
		G-005	22.92	24.55	26.3	1	35.74	33.2	26.2	1	1
		G-006	-	-	28.6	0	-	-	27.8	0	0
		G-007	-	-	27	0	36.63	34.33	25	1	0
		G-008	-	-	24.6	0	-	34.78	22.9	1	0
		G-010	-	-	24	0	-	35.42	28.9	1	0
		G-011	-	-	27	0	-	-	27.5	0	0
		G-012	14.26	15.8	25.7	1	22.56	24.24	24.1	1	1
		G-013	36.49	-	28.5	1	33.45	35.18	21.2	1	1
		G-014	-	-	23.8	0	34.72	35.35	26.8	1	0
		G-015	16.61	18.03	25.4	1	33.86	37.73	24.4	1	1
		Average	22.6815	24.3275	26.2316		29.6808	30.4741	23.1894
		Std Dev	6.60751	6.59599	2.68587		4.88958	4.77695	2.42315

## Sheet: Inpatients
Hospital - Cohort	Previous Diagnosis	Samples Code	NP-OP				Saliva				Both	Same
			FAM	HEX	Cy5	Positive?	FAM	HEX	Cy5	Positive?				Contingency Table
RSDK	Positive	C850399	19.71	21.35	3.81	1	30.94	31.47	23.9	1	1	1			Gargle		Total	k-coefficient		Effect size	Value	95% CI
	Positive	C458228	33.84	34.51	24.15	1	30.84	30.53	23.75	1	1	1		NPOP Swab	Positive	Negative				Sensitivity	0.8723	74.83% to 94.02%
	Positive	C851260	-	-	29.33	0	36.51	34.47	23.86	1	0	0		Positive	41	6	47	0.682		Specificity	0.8421	62.43% to 94.48%
	Positive	C076938	17.71	18.94	26.78	1	24.95	25.93	25.24	1	1	1		Negative	3	16	19			Positive Predictive Value	0.9318	81.77% to 97.65%
	Positive	C831634	12.46	12.87	26.74	1	19.34	19.67	21.77	1	1	1		Total	44	22	66			Negative Predictive Value	0.7273	51.85% to 86.85%
	Positive	C850742	33.89	35.82	24.82	1	35.07	33.55	19.84	1	1	1
	Positive	C844490	14.3	15.86	27.22	1	25.26	25.72	22.07	1	1	1
	Positive	C849449	-	-	25.97	0	33.28	32.3	25	1	0	0		NPOP Swab_Concordance to prev result
	Positive	C214035	21.38	22.47	25.57	1	30.31	31.63	23.33	1	1	1		Previous Results	NPOP			k-coefficient		Effect size	Value	95% CI
	Positive	C852242	21.46	22.58	21.46	1	27.28	28.73	28.54	1	1	1			Positive	Negative	Total			Sensitivity	0.8868	77.42% to 94.71%
	Positive	C850599	13.37	13.46	21.89	1	20.74	21.35	23.44	1	1	1		Positive	47	6	53	0.755		Specificity	1	77.19% to 100%
	Positive	C852161	16.41	18.49	29.09	1	22.52	24.92	22.47	1	1	1		Negative	0	13	13			Positive Predictive Value	1	92.44% to 100%
	Positive	C124311	19.63	21.89	28	1	23.92	23.76	28.74	1	1	1		Total	47	19	66			Negative Predictive Value	0.6842	46.01% to 84.64%
	Positive	C851363	21.78	23.97	28.37	1	34.37	35.92	21.59	1	1	1
	Positive	C854095	-	-	29.19	0	-	-	25.23	0	0	1
	Positive	C854266	23.86	26.34	30.48	1	35.87	37.24	23.76	1	1	1		Gargle_Concordance to prev result
	Negative	C853860	-	-	28.74	0	-	-	23.56	0	0	1		Previous Results	Gargle		Total	k-coefficient		Effect size	Value	95% CI
	Positive	B065366	31.36	33.56	25.86	1	-	-	21.75	0	0	0			Positive	Negative				Sensitivity	0.8302	70.77% to 90.80%
	Positive	C498381	29.92	32.32	25.85	1	-	-	23.44	0	0	0		Positive	44	9	53	0.658		Specificity	1	77.19% to 100%
	Positive	C854070	22.52	24.94	24.61	1	32.84	38.34	24.76	1	1	1		Negative	0	13	13			Positive Predictive Value	1	91.97% to 100%
	Positive	C854422	27.56	30.19	22.92	1	29.27	31.85	19.38	1	1	1		Total	44	22	66			Negative Predictive Value	0.5909	38.73% to 76.74%
	Positive	C853541	-	-	23.64	0	-	-	20.31	0	0	1
	Positive	C851377	29.79	30.78	28.13	1	35.76	-	27.16	1	1	1
	Negative	C854992	-	-	23.56	0	-	-	20.02	0	0	1
	Negative	C846273	-	-	27.88	0	-	-	22.99	0	0	1
	Negative	C854025	-	-	22.39	0	-	-	26.35	0	0	1
	Positive	C851471	15.64	17.62	26.86	1	33.57	-	28.3	1	1	1
	Positive	C855182	16.64	18.46	23.98	1	28.27	28.98	22.92	1	1	1
	Positive	C854992	19.53	21.45	27.2	1	30.51	30.89	25.93	1	1	1
	Positive	C551166	17.78	19.55	26.9	1	24.79	25.7	25.25	1	1	1
	Positive	C304674	27.74	29.61	27.58	1	32.38	33.46	26.59	1	1
RSND	Positive	A-001	28.17	30.15	23.85	1	36.52	35.96	23.04	1	1	1
	Positive	A-002	33.61	35.07	25.1	1	35.44	-	23.2	1	1	1
	Positive	A-003	36.6	-		1	35.42	36.05	22.57	1	1	1
	Positive	A-004	25.95	28	23.41	1	-	35.83	18.74	1	1	1
	Positive	A-005	-	37.08	27.83	1	-	34.07	23.67	1	1	1
	Positive	A-006	21.67	23.68	26.22	1	35.36	35.18	22.33	1	1	1
	Positive	A-007	27.74	29.64	27.52	1	33.67	34.58	21.18	1	1	1
	Positive	A-008	28.6	29.5	28.17	1	24.5	27.66	22.37	1	1	1
	Positive	A-009	33	35.32	23.85	1	-	36.02	21.38	1	1	1
	Positive	A-010	25.17	26.91	25.21	1	35.35	33	22.13	1	1	1
	Positive	A-011	32.07	33.92	25.54	1	35.19	34.25	21.58	1	1	1
	Positive	A-012	33	33.68	26.61	1	33.22	33.11	20.69	1	1	1
	Positive	A-013	26.41	27.52	24.37	1	33.2	35.14	21.18	1	1	1
	Positive	A-014	-	-	22.09	0	35.41	36.22	23.04	1	0	0
	Positive	A-015	-	-	24.87	0	-	-	23.85	0	0	1
	Positive	A-016	36.72	37.13	26.11	1	35.04	35.32	22.14	1	1	1
	Positive	A-017	36.7	37.48	22.37	1	-	-	20.95	0	0	0
	Positive	A-018	27.84	29.28	24.71	1	36.57	-	20.57	1	1	1
	Positive	A-019	17.57	18.51	23.97	1	36.17	35.36	19.79	1	1	1
	Positive	A-020	29.69	31.51	24.88	1	-	-	23.75	0	0	0
	Positive	A-021	24.79	25.58	24.11	1	28.67	30.72	21.15	1	1	1
	Positive	A-022	34.4	36.72	27.08	1	-	-	25.83	0	0	0
	Positive	A-023	32.29	34.48	25.73	1	-	-	22.07	0	0	0
	Positive	A-024	20.7	22.9	25.8	1	25.5	26.4	24.2	1	1	1
	Positive	A-025	27.09	28.37	27.88	1	26.65	28.93	21.76	1	1	1
	Positive	A-026	29.75	30.83	26.01	1	29.66	30.99	25.47	1	1	1
	Negative	B-001	-	-	25.16	0	-	-	23.1	0	0	1
	Negative	B-002	-	-	25.48	0	-	-	20.95	0	0	1
	Negative	B-003	-	-	26.64	0	-	-	25.61	0	0	1
	Negative	B-004	-	-	27.18	0	-	-	21.18	0	0	1
	Negative	B-005	-	-	23.25	0	-	-	20.59	0	0	1
	Negative	B-006	-	-	25.6	0	-	-	21.21	0	0	1
	Negative	B-007	-	-	20.92	0	-	-	20.33	0	0	1
	Negative	B-008	-	-	22.98	0	-	-	18.96	0	0	1
	Negative	B-009	-	-	25.2	0	-	-	25.78	0	0	1
		Average	25.6046	27.1802	25.3026		30.9788	31.53	22.9936
		Std Dev	6.82067	6.82923	3.423		4.87958	4.56161	2.3144

## Sheet: Outpatients
Hospital	Samples Code	NP-OP				Saliva				Both Positive
		helicase	RdRP	RPP30	Positive?	helicase	RdRP	RPP30	Positive?			Contigency Table
RSDK	C740899	34.57	34.6	28.84	1	-	-	20.43	0	0		NPOP Swab	Gargle		Total	k-coefficient		Effect size	Value	95% CI
	C676995	-	-	29.96	0	-	-	28.88	0	0			Positive	Negative				Sensitivity	0.8514	78.52% to 89.97%
	C693800	-	-	29.44	0	-	-	23.54	0	0		Positive	126	22	148	0.723		Specificity	0.8854	80.64% to 93.48%
	C830957	20.36	21.26	26.57	1	28.7	29.33	19.74	1	1		Negative	11	85	96			Positive Predictive Value	0.9197	86.19% to 95.46%
	C693714	-	-	28.92	0	-	-	24.4	0	0		Total	137	107	244			Negative Predictive Value	0.7944	70.83% to 86.01%
	C583838	-	-	26.46	0	-	-	21.94	0	0
	C798443	15.65	16.7	27.78	1	26.33	26.77	21.7	1	1
	C523456	-	-	27.2	0	-	-	22.37	0	0
	C750918	18.89	19.96	30.23	1	24.48	25.43	21.72	1	1
	C242123	-	-	27.78	0	-	-	21.29	0	0
	C242123	-	-	26.14	0	-	-	22.47	0	0
	C750407	14.79	15.51	25.36	1	24.59	25.35	19.85	1	1
	C537261	17.71	18.57	29.95	1	26.7	27.26	20.7	1	1
	BS	15.46	16.29	25.71	1	16.32	16.63	19.57	1	1
	C750404	16.68	17.48	27.96	1	18.77	18.36	21.25	1	1
	C861668	20.98	21.95	27.23	1	30.53	32.38	19.86	1	1
	C438761	22.47	23.36	26.43	1	29.38	29.92	20.97	1	1
	C660265	16.95	17.72	27.03	1	26.37	25.78	20.69	1	1
	C323911	-	-	27.38	0	-	-	22.61	0	0
	AKF	-	-	25.35	0	-	-	23.51	0	0
	ER	-	-	29.18	0	-	-	21.78	0	0
	STO	24.81	25.46	25.81	1	33.76	32.1	20.4	1	1
	C862086	-	-	22.49	0	34.9	37.76	18.08	1	0
	C693687	17.34	18.77	26.91	1	31.38	30.55	20.97	1	1
	C810214	14.8	15.69	25.12	1	31.54	30.74	23.83	1	1
	SPA	15.58	16.47	29.35	1	18.96	19.69	19.77	1	1
	NK	22.81	23.76	27.55	1	34.62	35.48	21.53	1	1
	C664525	-	-	25.9	0	-	-	21.96	0	0
	DMS	22.56	23.43	27.95	1	32.97	32.83	21.58	1	1
	MW	23.25	23.99	28.33	1	31.8	32.58	20.87	1	1
	FAR	29.61	30.42	26.74	1	32.59	31.67	21.3	1	1
	B405344	-	-	28.83	0	-	-	19.92	0	0
	C664522	-	-	28.74	0	-	-	22.42	0	0
	SFY	-	-	28.45	0	-	-	24.87	0	0
	MSN	-	-	24.7	0	-	-	21.98	0	0
	C861275	20.72	21.62	25.89	1	25.75	26.46	18.92	1	1
	C628384	-	-	28.69	0	-	-	22.82	0	0
	EWH	19.44	19.93	24.72	1	30.72	30.65	21.85	1	1
	JWT	23.9	24.62	28.4	1	27.33	27.91	22.79	1	1
	C740697	25.49	25.64	27.17	1	-	-	21.69	0	0
	C860462	-	-	25.58	0	-	-	20.49	0	0
	C693815	-	-	30.59	0	-	-	23.46	0	0
	C845534	24.84	25.97	26.77	1	32.88	30.77	21.9	1	1
	FND	-	-	28.76	0	-	-	27.67	0	0
	C725280	23.96	25.76	21.69	1	35.91	33.4	23.34	1	1
	C727768	19.54	21.58	29.14	1	32.98	32.93	27.46	1	1
	C690256	17.64	19.47	26.65	1	31.82	32.15	20.78	1	1
	C671095	29.81	34.95	29.49	1	-	-	22.16	0	0
	C662083	15.4	17.24	25	1	27.63	29.28	21.93	1	1
	C499097	22.29	22.51	29.94	1	25.45	25.92	20.19	1	1
	THW	14.92	16.75	28.72	1	26.73	28.38	20.42	1	1
	C723256	16.77	19.35	31.44	1	24.89	26.87	25.27	1	1
	C911365	18.44	20.6	29.92	1	34.6	34.31	24.97	1	1
	C899212	20.21	22.69	26.6	1	32.97	34.48	25.1	1	1
	C661175	17.67	19.54	29.81	1	32.51	33.31	23.43	1	1
	EIA	18.2	20.1	28.88	1	30.8	30.47	21.81	1	1
	C742502	15.99	18.13	28.96	1	31.89	31.7	21.5	1	1
	FA	-	-	26.89	0	-	-	21.67	0	0
	C565531	16.85	19.4	30.42	1	28.9	22.12	20.55	1	1
	C451706	23.13	25.71	30.32	1	31.69	31.79	26.54	1	1
	C744295	14.34	16.24	25.83	1	28.13	27.98	23.57	1	1
	C783022	-	36.79	27.96	1	33.85	34.95	29.13	1	1
	C842336	31.33	34.61	27.77	1	-	-	23.63	0	0
	C355267	18.39	20.5	27.8	1	30.53	30.13	29.04	1	1
	C629145	19.2	20.9	26.19	1	32.45	32.36	24.14	1	1
	C660256	25.93	28.9	28.66	1	30.9	31.58	19.76	1	1
	RI	24.44	26.91	30.75	1	29.93	31.72	25.28	1	1
	ESH	-	-	28.75	0	30.51	32.73	22.89	1	0
	THI	33.9	-	27.19	1	-	-	20.25	0	0
	C659677	26.57	28.97	26.77	1	-	-	20.78	0	0
	C628378	16.73	18.99	25.99	1	28.54	29.34	24.13	1	1
	C121058	26.38	28.86	30.77	1	30.49	32.27	25.35	1	1
	C898338	32.51	36.75	28.92	1	-	-	24.53	0	0
	C718238	22.75	25.37	25.81	1	34.4	39.12	22.21	1	1
	C520836	34.52	37.2	27.94	1	-	-	25.2	0	0
	C867874	23.63	25.8	26.95	1	32.33	32.7	19.83	1	1
	C486638	24.71	26.71	24.71	1	34.83	34.35	22.64	1	1
	C324222	14.78	16.99	30.92	1	22.99	23.74	23.97	1	1
	C401155	21.62	23.91	27.97	1	34.81	35.34	22.46	1	1
	C719835	25.58	27.76	27.98	1	32.94	39.26	20.93	1	1
	C481658	17.64	20.27	29.05	1	24.54	24.45	20.39	1	1
	C166638	15.93	18.16	25.42	1	21.4	21.37	17.68	1	1
	C086946	17.93	20.52	28.49	1	26.76	28.63	24.31	1	1
	C378220	22.98	25.5	27.17	1	33.99	36.43	26.84	1	1
	MRW	16.31	18.8	23.65	1	30.86	32.91	30.02	1	1
	C65938	24.48	27.18	29.34	1	30.75	31.22	25.74	1	1
	C848253	21.38	23.92	27.27	1	34.35	34.6	20.66	1	1
	B288516	22.9	25.39	27.89	1	24.95	26.44	22.32	1	1
	C868152	27.45	30.46	29.56	1	31.49	32.52	20.19	1	1
	C006453	23.85	26.91	30.18	1	31.23	31.75	24.18	1	1
	C608122	15.86	17.81	23.79	1	25.68	26.37	24.28	1	1
	C578746	26.34	28.83	26.49	1	32.83	34.75	21.09	1	1
	C649481	21.58	23.49	27.1	1	32.74	32.73	20.16	1	1
	C668290	16.46	18.57	28.21	1	29.5	29.32	21.78	1	1
	C668352	-	-	20.65	0	-	-	20.58	0	0
	C782902	19.7	22.21	20.11	1	28.66	29.6	21.3	1	1
	C628335	18.54	20.94	28.87	1	27.89	25.92	20.19	1	1
	C525483	36.82	36.92	31.1	1	-	-	22.59	0	0
	C482262	26.69	28.76	27.19	1	29.67	29.54	23.45	1	1
	C591916	18.54	20.94	28.87	1	27.89	30.27	18.48	1	1
	C386681	16.58	18.7	31.81	1	33.47	33.39	21.13	1	1
	C846883	21.78	24.5	28.16	1	20.64	21.23	18.09	1	1
	C665454	14.7	17.15	29.65	1	27.4	27.44	21.27	1	1
	C481625	25.16	27.92	28.06	1	32.85	32.79	21.25	1	1
	C404021	30.93	33.94	26.62	1	-	-	21.95	0	0
	C525470	25.38	27.59	27.18	1	31.83	32.58	23.34	1	1
	C859267	19.65	21.74	26.83	1	23.5	24.28	23.72	1	1
	C610553	-	-	31.08	0	-	-	23.25	0	0
	C669980	28.75	29.42	28.59	1	-	-	25.72	0	0
	C872011	29.87	30.88	24.7	1	-	-	20.88	0	0
	B018178	30.81	30.8	25.27	1	31.85	30.93	21.21	1	1
	C872022	27.63	27.73	27.41	1	37.74	33.77	23.71	1	1
	C871995	34.6	33.31	29.31	1	35.69	37.76	20.67	1	1
	C871995	14.36	13.91	24.22	1	25.97	25.29	23.55	1	1
	C566165	17.38	17.55	21.95	1	25.67	25.46	22.79	1	1
	C874192	-	-	28.25	0	-	-	26.2	0	0
	C814857	32.45	32.51	24.37	1	37.3	33.55	23.27	1	1
	C414669	14.63	14.6	26.91	1	24.61	23.81	27.91	1	1
	C865823	16.94	17.67	22.6	1	25.75	25.44	24.41	1	1
	C386009	-	-	25.39	0	-	-	22.23	0	0
	C525452	15.68	16.34	26.48	1	33.83	31.88	24.33	1	1
	C681871	16.51	16.98	23.32	1	21.61	20.86	23.69	1	1
	C481656	16.7	17.42	23.4	1	35.25	37.86	20.65	1	1
	C874705	-	-	21.98	0	-	-	23.44	0	0
RSND	G-101	-	-	25.16	0	-	-	22.67	0	0
	G-120	31.9	32.94	25.98	1	-	-	22.45	0	0
	G-145	19.39	20.47	23.87	1	23.01	25.47	23.8	1	1
	G-192	-	-	24.44	0	-	-	22.13	0	0
	G-103	17.25	19.04	24.08	1	32.66	34.04	24.7	1	1
	G-123	16.65	18.41	21.24	1	27.33	30.04	21.25	1	1
	G-146	31.86	33.89	21.4	1	-	-	21.53	0	0
	G-169	20.25	21.68	22.49	1	35.84	36.35	22.26	1	1
	G-195	19.4	21.03	23.58	1	30.34	32.54	21.56	1	1
	G-106	17.3	18.6	26.6	1	22.3	24.05	24.24	1	1
	G-125	37.6	-	25.8	1	-	-	23.4	0	0
	G-149	19.3	20.8	24.2	1	28.94	30.9	23.84	1	1
	G-170	17.7	20.2	23.9	1	32.82	35.96	21.23	1	1
	G-196	-	-	30.3	0	-	-	27.3	0	0
	G-129	27.7	30.5	28.4	1	31.1	32.8	22.9	1	1
	G-150	-	-	26.7	0	-	-	24.6	0	0
	G-174	-	-	28.5	0	-	-	23.3	0	0
	G-197	-	-	26.9	0	36.7	-	25.2	1	0
	G-109	19.6	22.3	28.5	1	26.4	28.4	24.6	1	1
	G-130	34.7	36	24.2	1	-	-	24.1	0	0
	G-151	14.5	16.7	27.3	1	16.5	18.1	24.7	1	1
	G-177	-	-	28.8	0	-	-	25.4	0	0
	G-110	-	-	26.8	0	-	-	23.5	0	0
	G-131	-	-	28.3	0	-	-	22.7	0	0
	G-155	-	-	25.3	0	-	-	24.5	0	0
	G-178	31.5	32.6	24	1	-	-	24.9	0	0
	G-112	-	-	29.6	0	-	-	25.6	0	0
	G-133	30.4	32.6	28.5	1	29.5	31	23.2	1	1
	G-160	21.4	23.6	29.8	1	27.2	29.4	27.5	1	1
	G-307	-	-	27.4	0	-	-	25.65	0	0
	G-349	-	-	24.9	0	-	-	23.9	0	0
	G-384	-	-	26.8	0	-	-	23.4	0	0
	G-427	-	-	26.2	0	-	-	25.9	0	0
	G-476	-	37.1	25.6	1	-	-	26.8	0	0
	G-309	-	-	26	0	-	-	28.68	0	0
	G-353	-	-	26.2	0	-	-	23.4	0	0
	G-400	-	37.4	26.2	1	-	-	23.6	0	0
	G-429	-	-	26.6	0	-	-	24.9	0	0
	G-481	-	-	26.5	0	-	-	22.9	0	0
	G-317	-	-	26.1	0	-	-	21.8	0	0
	G-354	-	-	25.6	0	-	-	22	0	0
	G-405	14.2	16.1	21.6	1	26.4	30.7	21.1	1	1
	G-445	-	-	27	0	-	-	21.1	0	0
	G-496	14.6	17.1	23.6	1	26.2	29.3	20.3	1	1
	G-329	-	-	23.2	0	-	-	20.8	0	0
	G-355	26.9	29.3	27	1	30.5	32.8	24.2	1	1
	G-407	18.9	21.2	24.3	1	26.8	28.8	23.8	1	1
	G-449	18.9	21	23	1	29.3	30.8	28.2	1	1
	G-500	27.3	27.7	26.4	1	23.8	26.5	25.1	1	1
	G-330	18.3	20.5	27.1	1	30.4	32	25.2	1	1
	G-107	18.4	22.4	28.3	1	24.3	26.7	21.6	1	1
	G-362	-	-	26.82	0	-	-	23.85	0	0
	G-410	-	-	24.88	0	-	-	21.93	0	0
	G-454	18.07	19.18	22.93	1	30.07	31.2	21.29	1	1
	G-334	17.57	18.79	22.8	1	26.71	27.91	20.87	1	1
	G-371	-	-	27.53	0	-	-	21.82	0	0
	G-417	22.12	23.5	23.02	1	31.93	33.73	25.07	1	1
	G-455	-	-	23.43	0	-	-	21.09	0	0
	G-337	21.58	22.51	24.28	1	25.54	26.58	20.35	1	1
	G-376	19.75	20.73	23.08	1	30.86	31.79	20.25	1	1
	G-421	-	-	23.5	0	-	-	22.33	0	0
	G-463	36.33	-	26.72	1	-	-	22.37	0	0
	G-524	-	-	22.82	0	-	-	25.85	0	0
	G-596	-	-	23.81	0	-	-	23.87	0	0
	G-666	-	-	22.57	0	-	-	24.86	0	0
	G-729	14.81	16.48	24.64	1	22.56	24.92	22.5	1	1
	G-777	13.54	15.17	23.39	1	29.28	31.63	27.46	1	1
	G-526	18.57	20.43	22.95	1	30.23	33.38	21.23	1	1
	G-599	-	-	22.46	0	-	-	24.25	0	0
	G-670	-	-	24	0	-	-	22.23	0	0
	G-730	18.62	20.86	22.38	1	36.42	-	21.97	1	1
	G-779	-	-	25.07	0	-	-	21.48	0	0
	G-539	-	37.09	25.8	1	-	-	24.24	0	0
	G-600	-	-	23.68	0	-	-	21.45	0	0
	G-671	-	-	26.3	0	-	-	21.8	0	0
	G-738	-	-	28.4	0	-	-	28.9	0	0
	G-786	-	-	26.2	0	-	-	24.5	0	0
	G-540	-	-	29.8	0	-	-	23.7	0	0
	G-607	-	-	25.8	0	-	-	27.7	0	0
	G-678	-	-	23.8	0	-	-	22.1	0	0
	G-752	-	-	29.1	0	-	-	23.3	0	0
	G-792	-	-	27.6	0	-	-	23.4	0	0
	G-565	-	-	25.3	0	-	-	24.5	0	0
	G-613	-	-	27.8	0	-	-	24.3	0	0
	G-695	-	-	22.63	0	-	37.09	20.57	1	0
	G-757	-	-	23.97	0	-	-	27.38	0	0
	G-576	-	-	22.48	0	-	-	24.31	0	0
	G-616	15.45	17.04	21.53	1	22.02	23.92	26.37	1	1
	G-706	17.63	18.97	22.79	1	30.01	31.7	26.54	1	1
	G-710	-	-	28.49	0	-	-	25.58	0	0
	G-583	-	-	27.33	0	-	-	20.69	0	0
	G-619	-	-	23.78	0	-	-	21.04	0	0
	G-593	15.64	17.49	23.03	1	22.79	24.83	28.54	1	1
	G-626	-	-	26.66	0	-	-	21.72	0	0
	G-628	-	-	27.06	0	-	-	20.3	0	0
	G-721	13.28	15.16	26.82	1	30.09	32.37	26.72	1	1
	G-773	-	-	26.08	0	-	37.36	25.7	1	0
	G-424	12.04	13.98	26.57	1	12.9	14.86	21.07	1	1
	G-871	35.44	37.08	26.07	1	36.05	-	25.62	1	1
	G-182	-	-	26.53	0	-	-	22.41	0	0
	G-116	-	-	23.69	0	-	-	25.27	0	0
	G-162	36.47	36.75	26.3	1	-	-	28.27	0	0
	G-184	-	-	27.09	0	-	-	26.23	0	0
	G-119	-	-	26.47	0	-	-	24.41	0	0
	G-138	18.93	19.84	25.01	1	18.47	20.85	23.1	1	1
	G-166	-	-	31.17	0	-	-	29.98	0	0
	G-187	-	-	27.16	0	-	-	23.85	0	0
	G-002	-	-	25.4	0	35.51	35.17	26.3	1	0
	G-003	-	-	30.5	0	-	-	28.3	0	0
	G-004	-	-	24.7	0	-	36.9	23.8	1	0
	G-005	22.92	24.55	26.3	1	35.74	33.2	26.2	1	1
	G-006	-	-	28.6	0	-	-	27.8	0	0
	G-007	-	-	27	0	36.63	34.33	25	1	0
	G-008	-	-	24.6	0	-	34.78	22.9	1	0
	G-010	-	-	24	0	-	35.42	28.9	1	0
	G-011	-	-	27	0	-	-	27.5	0	0
	G-012	14.26	15.8	25.7	1	22.56	24.24	24.1	1	1
	G-013	36.49	-	28.5	1	33.45	35.18	21.2	1	1
	G-014	-	-	23.8	0	34.72	35.35	26.8	1	0
	G-015	16.61	18.03	25.4	1	33.86	37.73	24.4	1	1
	Average	21.7478	23.4163	26.4791		29.2777	30.1589	23.2424
	Std Dev	6.27991	6.2747	2.40109		4.84038	4.81094	2.45365

## Sheet: UI
	NP-OP			Saliva			Both Positive
	N1	N2	Positive?	N1	N2	Positive?			Contigency Table
Ct < 25	18.54	20.17	1	18.96	20.43	1	1		NPOP	Gargle		Total	k-coefficient		Effect size	Value	95% CI
	19.16	22.04	1	18.14	22.75	1	1			Positive	Negative				Sensitivity	0.8514	78.52% to 89.97%
	14.23	15.01	1	21.49	24.26	1	1		Positive	17	3	20	0.791		Specificity	0.8854	80.64% to 93.48%
	16.82	18.13	1	30.05	31.72	1	1		Negative	0	10	10			Positive Predictive Value	0.9197	86.19% to 95.46%
	20.68	22.04	1	25.06	27.33	1	1		Total	17	13	30			Negative Predictive Value	0.7944	70.83% to 86.01%
	16.86	17.62	1	19.79	21.8	1	1
	19.34	20.09	1	29.99	32.29	1	1
	19.63	20.82	1	22.21	24.51	1	1
	18.83	20.18	1	25.9	28.35	1	1
	18.54	19.82	1	22.31	25.1	1	1
Ct > 25	36	37.44	1	34.26	36.59	1	1
	25.12	25.88	1	32.4	34.71	1	1
	33.25	36.34	1	-	-	0	0
	25	26.03	1	20.31	22.56	1	1
	34.78	26.18	1	32.31	25.67	1	1
	33.01	36.55	1	36.61	38.37	1	1
	32.82	35.03	1	20.03	22.52	1	1
	36.14	37.5	1	-	-	0	0
	36.35	37.48	1	-	-	0	0
	26.26	29.16	1	21.93	24.43	1	1
Negative	-	-	0	-	-	0	0
	-	-	0	-	-	0	0
	-	-	0	-	-	0	0
	-	-	0	-	-	0	0
	-	-	0	-	-	0	0
	-	-	0	-	-	0	0
	-	-	0	-	-	0	0
	-	-	0	-	-	0	0
	-	-	0	-	-	0	0
	-	-	0	-	-	0	0
Average	25.068	26.1755		25.3971	27.2582
Std Dev	7.77578	7.80084		5.97609	5.50847

## Sheet: Ct Grouping
NPOP hel	NPOP Rd	NPOP RPP30	Ga Hel	Ga Rd	Ga RPP30		<20								<30								<35								<40									Sensitivity	CT Groups
12.46	12.87	26.74	19.34	19.67	21.77		NPOP hel	NPOP Rd	Pos?	Ga Hel	Ga Rd	Pos?	Both		NPOP hel	NPOP Rd	Pos?	Ga Hel	Ga Rd	Pos?	Both		NPOP hel	NPOP Rd	Pos?	Ga Hel	Ga Rd	Pos?	Both		NPOP hel	NPOP Rd	Pos?	Ga Hel	Ga Rd	Pos?	Both				<20	<30	<35	<40
13.37	13.46	21.89	20.74	21.35	23.44		12.46	12.87	1	19.34	19.67	1	1		12.46	12.87	1	19.34	19.67	1	1		12.46	12.87	1	19.34	19.67	1	1		12.46	12.87	1	19.34	19.67	1	1			Gargle	1	0.9796	0.9138	0.8564
14.36	13.91	24.22	25.97	25.29	23.55		13.37	13.46	1	20.74	21.35	1	1		13.37	13.46	1	20.74	21.35	1	1		13.37	13.46	1	20.74	21.35	1	1		13.37	13.46	1	20.74	21.35	1	1
12.04	13.98	26.57	12.9	14.86	21.07		14.36	13.91	1	25.97	25.29	1	1		14.36	13.91	1	25.97	25.29	1	1		14.36	13.91	1	25.97	25.29	1	1		14.36	13.91	1	25.97	25.29	1	1
14.63	14.6	26.91	24.61	23.81	27.91		12.04	13.98	1	12.9	14.86	1	1		12.04	13.98	1	12.9	14.86	1	1		12.04	13.98	1	12.9	14.86	1	1		12.04	13.98	1	12.9	14.86	1	1
13.28	15.16	26.82	30.09	32.37	26.72		14.63	14.6	1	24.61	23.81	1	1		14.63	14.6	1	24.61	23.81	1	1		14.63	14.6	1	24.61	23.81	1	1		14.63	14.6	1	24.61	23.81	1	1
13.54	15.17	23.39	29.28	31.63	27.46		13.28	15.16	1	30.09	32.37	1	1		13.28	15.16	1	30.09	32.37	1	1		13.28	15.16	1	30.09	32.37	1	1		13.28	15.16	1	30.09	32.37	1	1
14.79	15.51	25.36	24.59	25.35	19.85		13.54	15.17	1	29.28	31.63	1	1		13.54	15.17	1	29.28	31.63	1	1		13.54	15.17	1	29.28	31.63	1	1		13.54	15.17	1	29.28	31.63	1	1
14.8	15.69	25.12	31.54	30.74	23.83		14.79	15.51	1	24.59	25.35	1	1		14.79	15.51	1	24.59	25.35	1	1		14.79	15.51	1	24.59	25.35	1	1		14.79	15.51	1	24.59	25.35	1	1
14.26	15.8	25.7	22.56	24.24	24.1		14.8	15.69	1	31.54	30.74	1	1		14.8	15.69	1	31.54	30.74	1	1		14.8	15.69	1	31.54	30.74	1	1		14.8	15.69	1	31.54	30.74	1	1
14.3	15.86	27.22	25.26	25.72	22.07		14.26	15.8	1	22.56	24.24	1	1		14.26	15.8	1	22.56	24.24	1	1		14.26	15.8	1	22.56	24.24	1	1		14.26	15.8	1	22.56	24.24	1	1
14.2	16.1	21.6	26.4	30.7	21.1		14.3	15.86	1	25.26	25.72	1	1		14.3	15.86	1	25.26	25.72	1	1		14.3	15.86	1	25.26	25.72	1	1		14.3	15.86	1	25.26	25.72	1	1
14.34	16.24	25.83	28.13	27.98	23.57		14.2	16.1	1	26.4	30.7	1	1		14.2	16.1	1	26.4	30.7	1	1		14.2	16.1	1	26.4	30.7	1	1		14.2	16.1	1	26.4	30.7	1	1
15.46	16.29	25.71	16.32	16.63	19.57		14.34	16.24	1	28.13	27.98	1	1		14.34	16.24	1	28.13	27.98	1	1		14.34	16.24	1	28.13	27.98	1	1		14.34	16.24	1	28.13	27.98	1	1
15.68	16.34	26.48	33.83	31.88	24.33		15.46	16.29	1	16.32	16.63	1	1		15.46	16.29	1	16.32	16.63	1	1		15.46	16.29	1	16.32	16.63	1	1		15.46	16.29	1	16.32	16.63	1	1
15.58	16.47	29.35	18.96	19.69	19.77		15.68	16.34	1	33.83	31.88	1	1		15.68	16.34	1	33.83	31.88	1	1		15.68	16.34	1	33.83	31.88	1	1		15.68	16.34	1	33.83	31.88	1	1
14.81	16.48	24.64	22.56	24.92	22.5		15.58	16.47	1	18.96	19.69	1	1		15.58	16.47	1	18.96	19.69	1	1		15.58	16.47	1	18.96	19.69	1	1		15.58	16.47	1	18.96	19.69	1	1
15.65	16.7	27.78	26.33	26.77	21.7		14.81	16.48	1	22.56	24.92	1	1		14.81	16.48	1	22.56	24.92	1	1		14.81	16.48	1	22.56	24.92	1	1		14.81	16.48	1	22.56	24.92	1	1
14.5	16.7	27.3	16.5	18.1	24.7		15.65	16.7	1	26.33	26.77	1	1		15.65	16.7	1	26.33	26.77	1	1		15.65	16.7	1	26.33	26.77	1	1		15.65	16.7	1	26.33	26.77	1	1
14.92	16.75	28.72	26.73	28.38	20.42		14.5	16.7	1	16.5	18.1	1	1		14.5	16.7	1	16.5	18.1	1	1		14.5	16.7	1	16.5	18.1	1	1		14.5	16.7	1	16.5	18.1	1	1
16.51	16.98	23.32	21.61	20.86	23.69		14.92	16.75	1	26.73	28.38	1	1		14.92	16.75	1	26.73	28.38	1	1		14.92	16.75	1	26.73	28.38	1	1		14.92	16.75	1	26.73	28.38	1	1
14.78	16.99	30.92	22.99	23.74	23.97		16.51	16.98	1	21.61	20.86	1	1		16.51	16.98	1	21.61	20.86	1	1		16.51	16.98	1	21.61	20.86	1	1		16.51	16.98	1	21.61	20.86	1	1
15.45	17.04	21.53	22.02	23.92	26.37		14.78	16.99	1	22.99	23.74	1	1		14.78	16.99	1	22.99	23.74	1	1		14.78	16.99	1	22.99	23.74	1	1		14.78	16.99	1	22.99	23.74	1	1
14.6	17.1	23.6	26.2	29.3	20.3		15.45	17.04	1	22.02	23.92	1	1		15.45	17.04	1	22.02	23.92	1	1		15.45	17.04	1	22.02	23.92	1	1		15.45	17.04	1	22.02	23.92	1	1
14.7	17.15	29.65	27.4	27.44	21.27		14.6	17.1	1	26.2	29.3	1	1		14.6	17.1	1	26.2	29.3	1	1		14.6	17.1	1	26.2	29.3	1	1		14.6	17.1	1	26.2	29.3	1	1
15.4	17.24	25	27.63	29.28	21.93		14.7	17.15	1	27.4	27.44	1	1		14.7	17.15	1	27.4	27.44	1	1		14.7	17.15	1	27.4	27.44	1	1		14.7	17.15	1	27.4	27.44	1	1
16.7	17.42	23.4	35.25	37.86	20.65		15.4	17.24	1	27.63	29.28	1	1		15.4	17.24	1	27.63	29.28	1	1		15.4	17.24	1	27.63	29.28	1	1		15.4	17.24	1	27.63	29.28	1	1
16.68	17.48	27.96	18.77	18.36	21.25		16.7	17.42	1	35.25	37.86	1	1		16.7	17.42	1	35.25	37.86	1	1		16.7	17.42	1	35.25	37.86	1	1		16.7	17.42	1	35.25	37.86	1	1
15.64	17.49	23.03	22.79	24.83	28.54		16.68	17.48	1	18.77	18.36	1	1		16.68	17.48	1	18.77	18.36	1	1		16.68	17.48	1	18.77	18.36	1	1		16.68	17.48	1	18.77	18.36	1	1
17.38	17.55	21.95	25.67	25.46	22.79		15.64	17.49	1	22.79	24.83	1	1		15.64	17.49	1	22.79	24.83	1	1		15.64	17.49	1	22.79	24.83	1	1		15.64	17.49	1	22.79	24.83	1	1
15.64	17.62	26.86	33.57	-	28.3		17.38	17.55	1	25.67	25.46	1	1		17.38	17.55	1	25.67	25.46	1	1		17.38	17.55	1	25.67	25.46	1	1		17.38	17.55	1	25.67	25.46	1	1
16.94	17.67	22.6	25.75	25.44	24.41		15.64	17.62	1	33.57	-	1	1		15.64	17.62	1	33.57	-	1	1		15.64	17.62	1	33.57	-	1	1		15.64	17.62	1	33.57	-	1	1
16.95	17.72	27.03	26.37	25.78	20.69		16.94	17.67	1	25.75	25.44	1	1		16.94	17.67	1	25.75	25.44	1	1		16.94	17.67	1	25.75	25.44	1	1		16.94	17.67	1	25.75	25.44	1	1
15.86	17.81	23.79	25.68	26.37	24.28		16.95	17.72	1	26.37	25.78	1	1		16.95	17.72	1	26.37	25.78	1	1		16.95	17.72	1	26.37	25.78	1	1		16.95	17.72	1	26.37	25.78	1	1
16.61	18.03	25.4	33.86	37.73	24.4		15.86	17.81	1	25.68	26.37	1	1		15.86	17.81	1	25.68	26.37	1	1		15.86	17.81	1	25.68	26.37	1	1		15.86	17.81	1	25.68	26.37	1	1
15.99	18.13	28.96	31.89	31.7	21.5		16.61	18.03	1	33.86	37.73	1	1		16.61	18.03	1	33.86	37.73	1	1		16.61	18.03	1	33.86	37.73	1	1		16.61	18.03	1	33.86	37.73	1	1
15.93	18.16	25.42	21.4	21.37	17.68		15.99	18.13	1	31.89	31.7	1	1		15.99	18.13	1	31.89	31.7	1	1		15.99	18.13	1	31.89	31.7	1	1		15.99	18.13	1	31.89	31.7	1	1
16.65	18.41	21.24	27.33	30.04	21.25		15.93	18.16	1	21.4	21.37	1	1		15.93	18.16	1	21.4	21.37	1	1		15.93	18.16	1	21.4	21.37	1	1		15.93	18.16	1	21.4	21.37	1	1
16.64	18.46	23.98	28.27	28.98	22.92		16.65	18.41	1	27.33	30.04	1	1		16.65	18.41	1	27.33	30.04	1	1		16.65	18.41	1	27.33	30.04	1	1		16.65	18.41	1	27.33	30.04	1	1
16.41	18.49	29.09	22.52	24.92	22.47		16.64	18.46	1	28.27	28.98	1	1		16.64	18.46	1	28.27	28.98	1	1		16.64	18.46	1	28.27	28.98	1	1		16.64	18.46	1	28.27	28.98	1	1
17.57	18.51	23.97	36.17	35.36	19.79		16.41	18.49	1	22.52	24.92	1	1		16.41	18.49	1	22.52	24.92	1	1		16.41	18.49	1	22.52	24.92	1	1		16.41	18.49	1	22.52	24.92	1	1
17.71	18.57	29.95	26.7	27.26	20.7		17.57	18.51	1	36.17	35.36	1	1		17.57	18.51	1	36.17	35.36	1	1		17.57	18.51	1	36.17	35.36	1	1		17.57	18.51	1	36.17	35.36	1	1
16.46	18.57	28.21	29.5	29.32	21.78		17.71	18.57	1	26.7	27.26	1	1		17.71	18.57	1	26.7	27.26	1	1		17.71	18.57	1	26.7	27.26	1	1		17.71	18.57	1	26.7	27.26	1	1
17.3	18.6	26.6	22.3	24.05	24.24		16.46	18.57	1	29.5	29.32	1	1		16.46	18.57	1	29.5	29.32	1	1		16.46	18.57	1	29.5	29.32	1	1		16.46	18.57	1	29.5	29.32	1	1
16.58	18.7	31.81	33.47	33.39	21.13		17.3	18.6	1	22.3	24.05	1	1		17.3	18.6	1	22.3	24.05	1	1		17.3	18.6	1	22.3	24.05	1	1		17.3	18.6	1	22.3	24.05	1	1
17.34	18.77	26.91	31.38	30.55	20.97		16.58	18.7	1	33.47	33.39	1	1		16.58	18.7	1	33.47	33.39	1	1		16.58	18.7	1	33.47	33.39	1	1		16.58	18.7	1	33.47	33.39	1	1
17.57	18.79	22.8	26.71	27.91	20.87		17.34	18.77	1	31.38	30.55	1	1		17.34	18.77	1	31.38	30.55	1	1		17.34	18.77	1	31.38	30.55	1	1		17.34	18.77	1	31.38	30.55	1	1
16.31	18.8	23.65	30.86	32.91	30.02		17.57	18.79	1	26.71	27.91	1	1		17.57	18.79	1	26.71	27.91	1	1		17.57	18.79	1	26.71	27.91	1	1		17.57	18.79	1	26.71	27.91	1	1
17.71	18.94	26.78	24.95	25.93	25.24		16.31	18.8	1	30.86	32.91	1	1		16.31	18.8	1	30.86	32.91	1	1		16.31	18.8	1	30.86	32.91	1	1		16.31	18.8	1	30.86	32.91	1	1
17.63	18.97	22.79	30.01	31.7	26.54		17.71	18.94	1	24.95	25.93	1	1		17.71	18.94	1	24.95	25.93	1	1		17.71	18.94	1	24.95	25.93	1	1		17.71	18.94	1	24.95	25.93	1	1
16.73	18.99	25.99	28.54	29.34	24.13		17.63	18.97	1	30.01	31.7	1	1		17.63	18.97	1	30.01	31.7	1	1		17.63	18.97	1	30.01	31.7	1	1		17.63	18.97	1	30.01	31.7	1	1
17.25	19.04	24.08	32.66	34.04	24.7		16.73	18.99	1	28.54	29.34	1	1		16.73	18.99	1	28.54	29.34	1	1		16.73	18.99	1	28.54	29.34	1	1		16.73	18.99	1	28.54	29.34	1	1
18.07	19.18	22.93	30.07	31.2	21.29		17.25	19.04	1	32.66	34.04	1	1		17.25	19.04	1	32.66	34.04	1	1		17.25	19.04	1	32.66	34.04	1	1		17.25	19.04	1	32.66	34.04	1	1
16.77	19.35	31.44	24.89	26.87	25.27		18.07	19.18	1	30.07	31.2	1	1		18.07	19.18	1	30.07	31.2	1	1		18.07	19.18	1	30.07	31.2	1	1		18.07	19.18	1	30.07	31.2	1	1
16.85	19.4	30.42	28.9	22.12	20.55		16.77	19.35	1	24.89	26.87	1	1		16.77	19.35	1	24.89	26.87	1	1		16.77	19.35	1	24.89	26.87	1	1		16.77	19.35	1	24.89	26.87	1	1
17.64	19.47	26.65	31.82	32.15	20.78		16.85	19.4	1	28.9	22.12	1	1		16.85	19.4	1	28.9	22.12	1	1		16.85	19.4	1	28.9	22.12	1	1		16.85	19.4	1	28.9	22.12	1	1
17.67	19.54	29.81	32.51	33.31	23.43		17.64	19.47	1	31.82	32.15	1	1		17.64	19.47	1	31.82	32.15	1	1		17.64	19.47	1	31.82	32.15	1	1		17.64	19.47	1	31.82	32.15	1	1
17.78	19.55	26.9	24.79	25.7	25.25		17.67	19.54	1	32.51	33.31	1	1		17.67	19.54	1	32.51	33.31	1	1		17.67	19.54	1	32.51	33.31	1	1		17.67	19.54	1	32.51	33.31	1	1
18.93	19.84	25.01	18.47	20.85	23.1		17.78	19.55	1	24.79	25.7	1	1		17.78	19.55	1	24.79	25.7	1	1		17.78	19.55	1	24.79	25.7	1	1		17.78	19.55	1	24.79	25.7	1	1
19.44	19.93	24.72	30.72	30.65	21.85		18.93	19.84	1	18.47	20.85	1	1		18.93	19.84	1	18.47	20.85	1	1		18.93	19.84	1	18.47	20.85	1	1		18.93	19.84	1	18.47	20.85	1	1
18.89	19.96	30.23	24.48	25.43	21.72		19.44	19.93	1	30.72	30.65	1	1		19.44	19.93	1	30.72	30.65	1	1		19.44	19.93	1	30.72	30.65	1	1		19.44	19.93	1	30.72	30.65	1	1
18.2	20.1	28.88	30.8	30.47	21.81		18.89	19.96	1	24.48	25.43	1	1		18.89	19.96	1	24.48	25.43	1	1		18.89	19.96	1	24.48	25.43	1	1		18.89	19.96	1	24.48	25.43	1	1
17.7	20.2	23.9	32.82	35.96	21.23							Similar	61		18.2	20.1	1	30.8	30.47	1	1		18.2	20.1	1	30.8	30.47	1	1		18.2	20.1	1	30.8	30.47	1	1
17.64	20.27	29.05	24.54	24.45	20.39							Total	61		17.7	20.2	1	32.82	35.96	1	1		17.7	20.2	1	32.82	35.96	1	1		17.7	20.2	1	32.82	35.96	1	1
18.57	20.43	22.95	30.23	33.38	21.23								1		17.64	20.27	1	24.54	24.45	1	1		17.64	20.27	1	24.54	24.45	1	1		17.64	20.27	1	24.54	24.45	1	1
19.39	20.47	23.87	23.01	25.47	23.8										18.57	20.43	1	30.23	33.38	1	1		18.57	20.43	1	30.23	33.38	1	1		18.57	20.43	1	30.23	33.38	1	1
18.39	20.5	27.8	30.53	30.13	29.04										19.39	20.47	1	23.01	25.47	1	1		19.39	20.47	1	23.01	25.47	1	1		19.39	20.47	1	23.01	25.47	1	1
18.3	20.5	27.1	30.4	32	25.2										18.39	20.5	1	30.53	30.13	1	1		18.39	20.5	1	30.53	30.13	1	1		18.39	20.5	1	30.53	30.13	1	1
17.93	20.52	28.49	26.76	28.63	24.31										18.3	20.5	1	30.4	32	1	1		18.3	20.5	1	30.4	32	1	1		18.3	20.5	1	30.4	32	1	1
18.44	20.6	29.92	34.6	34.31	24.97										17.93	20.52	1	26.76	28.63	1	1		17.93	20.52	1	26.76	28.63	1	1		17.93	20.52	1	26.76	28.63	1	1
19.75	20.73	23.08	30.86	31.79	20.25										18.44	20.6	1	34.6	34.31	1	1		18.44	20.6	1	34.6	34.31	1	1		18.44	20.6	1	34.6	34.31	1	1
19.3	20.8	24.2	28.94	30.9	23.84										19.75	20.73	1	30.86	31.79	1	1		19.75	20.73	1	30.86	31.79	1	1		19.75	20.73	1	30.86	31.79	1	1
18.62	20.86	22.38	36.42	-	21.97										19.3	20.8	1	28.94	30.9	1	1		19.3	20.8	1	28.94	30.9	1	1		19.3	20.8	1	28.94	30.9	1	1
19.2	20.9	26.19	32.45	32.36	24.14										18.62	20.86	1	36.42	-	1	1		18.62	20.86	1	36.42	-	1	1		18.62	20.86	1	36.42	-	1	1
18.54	20.94	28.87	27.89	25.92	20.19										19.2	20.9	1	32.45	32.36	1	1		19.2	20.9	1	32.45	32.36	1	1		19.2	20.9	1	32.45	32.36	1	1
18.54	20.94	28.87	27.89	30.27	18.48										18.54	20.94	1	27.89	25.92	1	1		18.54	20.94	1	27.89	25.92	1	1		18.54	20.94	1	27.89	25.92	1	1
18.9	21	23	29.3	30.8	28.2										18.54	20.94	1	27.89	30.27	1	1		18.54	20.94	1	27.89	30.27	1	1		18.54	20.94	1	27.89	30.27	1	1
19.4	21.03	23.58	30.34	32.54	21.56										18.9	21	1	29.3	30.8	1	1		18.9	21	1	29.3	30.8	1	1		18.9	21	1	29.3	30.8	1	1
18.9	21.2	24.3	26.8	28.8	23.8										19.4	21.03	1	30.34	32.54	1	1		19.4	21.03	1	30.34	32.54	1	1		19.4	21.03	1	30.34	32.54	1	1
20.36	21.26	26.57	28.7	29.33	19.74										18.9	21.2	1	26.8	28.8	1	1		18.9	21.2	1	26.8	28.8	1	1		18.9	21.2	1	26.8	28.8	1	1
19.71	21.35	3.81	30.94	31.47	23.9										20.36	21.26	1	28.7	29.33	1	1		20.36	21.26	1	28.7	29.33	1	1		20.36	21.26	1	28.7	29.33	1	1
19.53	21.45	27.2	30.51	30.89	25.93										19.71	21.35	1	30.94	31.47	1	1		19.71	21.35	1	30.94	31.47	1	1		19.71	21.35	1	30.94	31.47	1	1
19.54	21.58	29.14	32.98	32.93	27.46										19.53	21.45	1	30.51	30.89	1	1		19.53	21.45	1	30.51	30.89	1	1		19.53	21.45	1	30.51	30.89	1	1
20.72	21.62	25.89	25.75	26.46	18.92										19.54	21.58	1	32.98	32.93	1	1		19.54	21.58	1	32.98	32.93	1	1		19.54	21.58	1	32.98	32.93	1	1
20.25	21.68	22.49	35.84	36.35	22.26										20.72	21.62	1	25.75	26.46	1	1		20.72	21.62	1	25.75	26.46	1	1		20.72	21.62	1	25.75	26.46	1	1
19.65	21.74	26.83	23.5	24.28	23.72										20.25	21.68	1	35.84	36.35	1	1		20.25	21.68	1	35.84	36.35	1	1		20.25	21.68	1	35.84	36.35	1	1
19.63	21.89	28	23.92	23.76	28.74										19.65	21.74	1	23.5	24.28	1	1		19.65	21.74	1	23.5	24.28	1	1		19.65	21.74	1	23.5	24.28	1	1
20.98	21.95	27.23	30.53	32.38	19.86										19.63	21.89	1	23.92	23.76	1	1		19.63	21.89	1	23.92	23.76	1	1		19.63	21.89	1	23.92	23.76	1	1
19.7	22.21	20.11	28.66	29.6	21.3										20.98	21.95	1	30.53	32.38	1	1		20.98	21.95	1	30.53	32.38	1	1		20.98	21.95	1	30.53	32.38	1	1
19.6	22.3	28.5	26.4	28.4	24.6										19.7	22.21	1	28.66	29.6	1	1		19.7	22.21	1	28.66	29.6	1	1		19.7	22.21	1	28.66	29.6	1	1
18.4	22.4	28.3	24.3	26.7	21.6										19.6	22.3	1	26.4	28.4	1	1		19.6	22.3	1	26.4	28.4	1	1		19.6	22.3	1	26.4	28.4	1	1
21.38	22.47	25.57	30.31	31.63	23.33										18.4	22.4	1	24.3	26.7	1	1		18.4	22.4	1	24.3	26.7	1	1		18.4	22.4	1	24.3	26.7	1	1
22.29	22.51	29.94	25.45	25.92	20.19										21.38	22.47	1	30.31	31.63	1	1		21.38	22.47	1	30.31	31.63	1	1		21.38	22.47	1	30.31	31.63	1	1
21.58	22.51	24.28	25.54	26.58	20.35										22.29	22.51	1	25.45	25.92	1	1		22.29	22.51	1	25.45	25.92	1	1		22.29	22.51	1	25.45	25.92	1	1
21.46	22.58	21.46	27.28	28.73	28.54										21.58	22.51	1	25.54	26.58	1	1		21.58	22.51	1	25.54	26.58	1	1		21.58	22.51	1	25.54	26.58	1	1
20.21	22.69	26.6	32.97	34.48	25.1										21.46	22.58	1	27.28	28.73	1	1		21.46	22.58	1	27.28	28.73	1	1		21.46	22.58	1	27.28	28.73	1	1
20.7	22.9	25.8	25.5	26.4	24.2										20.21	22.69	1	32.97	34.48	1	1		20.21	22.69	1	32.97	34.48	1	1		20.21	22.69	1	32.97	34.48	1	1
22.47	23.36	26.43	29.38	29.92	20.97										20.7	22.9	1	25.5	26.4	1	1		20.7	22.9	1	25.5	26.4	1	1		20.7	22.9	1	25.5	26.4	1	1
22.56	23.43	27.95	32.97	32.83	21.58										22.47	23.36	1	29.38	29.92	1	1		22.47	23.36	1	29.38	29.92	1	1		22.47	23.36	1	29.38	29.92	1	1
21.58	23.49	27.1	32.74	32.73	20.16										22.56	23.43	1	32.97	32.83	1	1		22.56	23.43	1	32.97	32.83	1	1		22.56	23.43	1	32.97	32.83	1	1
22.12	23.5	23.02	31.93	33.73	25.07										21.58	23.49	1	32.74	32.73	1	1		21.58	23.49	1	32.74	32.73	1	1		21.58	23.49	1	32.74	32.73	1	1
21.4	23.6	29.8	27.2	29.4	27.5										22.12	23.5	1	31.93	33.73	1	1		22.12	23.5	1	31.93	33.73	1	1		22.12	23.5	1	31.93	33.73	1	1
21.67	23.68	26.22	35.36	35.18	22.33										21.4	23.6	1	27.2	29.4	1	1		21.4	23.6	1	27.2	29.4	1	1		21.4	23.6	1	27.2	29.4	1	1
22.81	23.76	27.55	34.62	35.48	21.53										21.67	23.68	1	35.36	35.18	1	1		21.67	23.68	1	35.36	35.18	1	1		21.67	23.68	1	35.36	35.18	1	1
21.62	23.91	27.97	34.81	35.34	22.46										22.81	23.76	1	34.62	35.48	1	1		22.81	23.76	1	34.62	35.48	1	1		22.81	23.76	1	34.62	35.48	1	1
21.38	23.92	27.27	34.35	34.6	20.66										21.62	23.91	1	34.81	35.34	1	1		21.62	23.91	1	34.81	35.34	1	1		21.62	23.91	1	34.81	35.34	1	1
21.78	23.97	28.37	34.37	35.92	21.59										21.38	23.92	1	34.35	34.6	1	1		21.38	23.92	1	34.35	34.6	1	1		21.38	23.92	1	34.35	34.6	1	1
23.25	23.99	28.33	31.8	32.58	20.87										21.78	23.97	1	34.37	35.92	1	1		21.78	23.97	1	34.37	35.92	1	1		21.78	23.97	1	34.37	35.92	1	1
21.78	24.5	28.16	20.64	21.23	18.09										23.25	23.99	1	31.8	32.58	1	1		23.25	23.99	1	31.8	32.58	1	1		23.25	23.99	1	31.8	32.58	1	1
22.92	24.55	26.3	35.74	33.2	26.2										21.78	24.5	1	20.64	21.23	1	1		21.78	24.5	1	20.64	21.23	1	1		21.78	24.5	1	20.64	21.23	1	1
23.9	24.62	28.4	27.33	27.91	22.79										22.92	24.55	1	35.74	33.2	1	1		22.92	24.55	1	35.74	33.2	1	1		22.92	24.55	1	35.74	33.2	1	1
22.52	24.94	24.61	32.84	38.34	24.76										23.9	24.62	1	27.33	27.91	1	1		23.9	24.62	1	27.33	27.91	1	1		23.9	24.62	1	27.33	27.91	1	1
22.75	25.37	25.81	34.4	39.12	22.21										22.52	24.94	1	32.84	38.34	1	1		22.52	24.94	1	32.84	38.34	1	1		22.52	24.94	1	32.84	38.34	1	1
22.9	25.39	27.89	24.95	26.44	22.32										22.75	25.37	1	34.4	39.12	1	1		22.75	25.37	1	34.4	39.12	1	1		22.75	25.37	1	34.4	39.12	1	1
24.81	25.46	25.81	33.76	32.1	20.4										22.9	25.39	1	24.95	26.44	1	1		22.9	25.39	1	24.95	26.44	1	1		22.9	25.39	1	24.95	26.44	1	1
22.98	25.5	27.17	33.99	36.43	26.84										24.81	25.46	1	33.76	32.1	1	1		24.81	25.46	1	33.76	32.1	1	1		24.81	25.46	1	33.76	32.1	1	1
24.79	25.58	24.11	28.67	30.72	21.15										22.98	25.5	1	33.99	36.43	1	1		22.98	25.5	1	33.99	36.43	1	1		22.98	25.5	1	33.99	36.43	1	1
25.49	25.64	27.17	-	-	21.69										24.79	25.58	1	28.67	30.72	1	1		24.79	25.58	1	28.67	30.72	1	1		24.79	25.58	1	28.67	30.72	1	1
23.13	25.71	30.32	31.69	31.79	26.54										25.49	25.64	1	-	-	0	0		25.49	25.64	1	-	-	0	0		25.49	25.64	1	-	-	0	0
23.96	25.76	21.69	35.91	33.4	23.34										23.13	25.71	1	31.69	31.79	1	1		23.13	25.71	1	31.69	31.79	1	1		23.13	25.71	1	31.69	31.79	1	1
23.63	25.8	26.95	32.33	32.7	19.83										23.96	25.76	1	35.91	33.4	1	1		23.96	25.76	1	35.91	33.4	1	1		23.96	25.76	1	35.91	33.4	1	1
24.84	25.97	26.77	32.88	30.77	21.9										23.63	25.8	1	32.33	32.7	1	1		23.63	25.8	1	32.33	32.7	1	1		23.63	25.8	1	32.33	32.7	1	1
23.86	26.34	30.48	35.87	37.24	23.76										24.84	25.97	1	32.88	30.77	1	1		24.84	25.97	1	32.88	30.77	1	1		24.84	25.97	1	32.88	30.77	1	1
24.71	26.71	24.71	34.83	34.35	22.64										23.86	26.34	1	35.87	37.24	1	1		23.86	26.34	1	35.87	37.24	1	1		23.86	26.34	1	35.87	37.24	1	1
24.44	26.91	30.75	29.93	31.72	25.28										24.71	26.71	1	34.83	34.35	1	1		24.71	26.71	1	34.83	34.35	1	1		24.71	26.71	1	34.83	34.35	1	1
23.85	26.91	30.18	31.23	31.75	24.18										24.44	26.91	1	29.93	31.72	1	1		24.44	26.91	1	29.93	31.72	1	1		24.44	26.91	1	29.93	31.72	1	1
25.17	26.91	25.21	35.35	33	22.13										23.85	26.91	1	31.23	31.75	1	1		23.85	26.91	1	31.23	31.75	1	1		23.85	26.91	1	31.23	31.75	1	1
24.48	27.18	29.34	30.75	31.22	25.74										25.17	26.91	1	35.35	33	1	1		25.17	26.91	1	35.35	33	1	1		25.17	26.91	1	35.35	33	1	1
26.41	27.52	24.37	33.2	35.14	21.18										24.48	27.18	1	30.75	31.22	1	1		24.48	27.18	1	30.75	31.22	1	1		24.48	27.18	1	30.75	31.22	1	1
25.38	27.59	27.18	31.83	32.58	23.34										26.41	27.52	1	33.2	35.14	1	1		26.41	27.52	1	33.2	35.14	1	1		26.41	27.52	1	33.2	35.14	1	1
27.3	27.7	26.4	23.8	26.5	25.1										25.38	27.59	1	31.83	32.58	1	1		25.38	27.59	1	31.83	32.58	1	1		25.38	27.59	1	31.83	32.58	1	1
27.63	27.73	27.41	37.74	33.77	23.71										27.3	27.7	1	23.8	26.5	1	1		27.3	27.7	1	23.8	26.5	1	1		27.3	27.7	1	23.8	26.5	1	1
25.58	27.76	27.98	32.94	39.26	20.93										27.63	27.73	1	37.74	33.77	1	1		27.63	27.73	1	37.74	33.77	1	1		27.63	27.73	1	37.74	33.77	1	1
25.16	27.92	28.06	32.85	32.79	21.25										25.58	27.76	1	32.94	39.26	1	1		25.58	27.76	1	32.94	39.26	1	1		25.58	27.76	1	32.94	39.26	1	1
25.95	28	23.41	-	35.83	18.74										25.16	27.92	1	32.85	32.79	1	1		25.16	27.92	1	32.85	32.79	1	1		25.16	27.92	1	32.85	32.79	1	1
27.09	28.37	27.88	26.65	28.93	21.76										25.95	28	1	-	35.83	1	1		25.95	28	1	-	35.83	1	1		25.95	28	1	-	35.83	1	1
26.69	28.76	27.19	29.67	29.54	23.45										27.09	28.37	1	26.65	28.93	1	1		27.09	28.37	1	26.65	28.93	1	1		27.09	28.37	1	26.65	28.93	1	1
26.34	28.83	26.49	32.83	34.75	21.09										26.69	28.76	1	29.67	29.54	1	1		26.69	28.76	1	29.67	29.54	1	1		26.69	28.76	1	29.67	29.54	1	1
26.38	28.86	30.77	30.49	32.27	25.35										26.34	28.83	1	32.83	34.75	1	1		26.34	28.83	1	32.83	34.75	1	1		26.34	28.83	1	32.83	34.75	1	1
25.93	28.9	28.66	30.9	31.58	19.76										26.38	28.86	1	30.49	32.27	1	1		26.38	28.86	1	30.49	32.27	1	1		26.38	28.86	1	30.49	32.27	1	1
26.57	28.97	26.77	-	-	20.78										25.93	28.9	1	30.9	31.58	1	1		25.93	28.9	1	30.9	31.58	1	1		25.93	28.9	1	30.9	31.58	1	1
27.84	29.28	24.71	36.57	-	20.57										26.57	28.97	1	-	-	0	0		26.57	28.97	1	-	-	0	0		26.57	28.97	1	-	-	0	0
26.9	29.3	27	30.5	32.8	24.2										27.84	29.28	1	36.57	-	1	1		27.84	29.28	1	36.57	-	1	1		27.84	29.28	1	36.57	-	1	1
28.75	29.42	28.59	-	-	25.72										26.9	29.3	1	30.5	32.8	1	1		26.9	29.3	1	30.5	32.8	1	1		26.9	29.3	1	30.5	32.8	1	1
28.6	29.5	28.17	24.5	27.66	22.37										28.75	29.42	1	-	-	0	0		28.75	29.42	1	-	-	0	0		28.75	29.42	1	-	-	0	0
27.74	29.61	27.58	32.38	33.46	26.59										28.6	29.5	1	24.5	27.66	1	1		28.6	29.5	1	24.5	27.66	1	1		28.6	29.5	1	24.5	27.66	1	1
27.74	29.64	27.52	33.67	34.58	21.18										27.74	29.61	1	32.38	33.46	1	1		27.74	29.61	1	32.38	33.46	1	1		27.74	29.61	1	32.38	33.46	1	1
28.17	30.15	23.85	36.52	35.96	23.04										27.74	29.64	1	33.67	34.58	1	1		27.74	29.64	1	33.67	34.58	1	1		27.74	29.64	1	33.67	34.58	1	1
27.56	30.19	22.92	29.27	31.85	19.38															Similar	144		28.17	30.15	1	36.52	35.96	1	1		28.17	30.15	1	36.52	35.96	1	1
29.61	30.42	26.74	32.59	31.67	21.3															Total	147		27.56	30.19	1	29.27	31.85	1	1		27.56	30.19	1	29.27	31.85	1	1
27.45	30.46	29.56	31.49	32.52	20.19																0.979592		29.61	30.42	1	32.59	31.67	1	1		29.61	30.42	1	32.59	31.67	1	1
27.7	30.5	28.4	31.1	32.8	22.9																		27.45	30.46	1	31.49	32.52	1	1		27.45	30.46	1	31.49	32.52	1	1
29.79	30.78	28.13	35.76	-	27.16																		27.7	30.5	1	31.1	32.8	1	1		27.7	30.5	1	31.1	32.8	1	1
30.81	30.8	25.27	31.85	30.93	21.21																		29.79	30.78	1	35.76	-	1	1		29.79	30.78	1	35.76	-	1	1
29.75	30.83	26.01	29.66	30.99	25.47																		30.81	30.8	1	31.85	30.93	1	1		30.81	30.8	1	31.85	30.93	1	1
29.87	30.88	24.7	-	-	20.88																		29.75	30.83	1	29.66	30.99	1	1		29.75	30.83	1	29.66	30.99	1	1
29.69	31.51	24.88	-	-	23.75																		29.87	30.88	1	-	-	0	0		29.87	30.88	1	-	-	0	0
29.92	32.32	25.85	-	-	23.44																		29.69	31.51	1	-	-	0	0		29.69	31.51	1	-	-	0	0
32.45	32.51	24.37	37.3	33.55	23.27																		29.92	32.32	1	-	-	0	0		29.92	32.32	1	-	-	0	0
31.5	32.6	24	-	-	24.9																		32.45	32.51	1	37.3	33.55	1	1		32.45	32.51	1	37.3	33.55	1	1
30.4	32.6	28.5	29.5	31	23.2																		31.5	32.6	1	-	-	0	0		31.5	32.6	1	-	-	0	0
31.9	32.94	25.98	-	-	22.45																		30.4	32.6	1	29.5	31	1	1		30.4	32.6	1	29.5	31	1	1
34.6	33.31	29.31	35.69	37.76	20.67																		31.9	32.94	1	-	-	0	0		31.9	32.94	1	-	-	0	0
31.36	33.56	25.86	-	-	21.75																		34.6	33.31	1	35.69	37.76	1	1		34.6	33.31	1	35.69	37.76	1	1
33	33.68	26.61	33.22	33.11	20.69																		31.36	33.56	1	-	-	0	0		31.36	33.56	1	-	-	0	0
31.86	33.89	21.4	-	-	21.53																		33	33.68	1	33.22	33.11	1	1		33	33.68	1	33.22	33.11	1	1
32.07	33.92	25.54	35.19	34.25	21.58																		31.86	33.89	1	-	-	0	0		31.86	33.89	1	-	-	0	0
30.93	33.94	26.62	-	-	21.95																		32.07	33.92	1	35.19	34.25	1	1		32.07	33.92	1	35.19	34.25	1	1
32.29	34.48	25.73	-	-	22.07																		30.93	33.94	1	-	-	0	0		30.93	33.94	1	-	-	0	0
33.84	34.51	24.15	30.84	30.53	23.75																		32.29	34.48	1	-	-	0	0		32.29	34.48	1	-	-	0	0
34.57	34.6	28.84	-	-	20.43																		33.84	34.51	1	30.84	30.53	1	1		33.84	34.51	1	30.84	30.53	1	1
31.33	34.61	27.77	-	-	23.63																		34.57	34.6	1	-	-	0	0		34.57	34.6	1	-	-	0	0
29.81	34.95	29.49	-	-	22.16																		31.33	34.61	1	-	-	0	0		31.33	34.61	1	-	-	0	0
33.61	35.07	25.1	35.44	-	23.2																		29.81	34.95	1	-	-	0	0		29.81	34.95	1	-	-	0	0
33	35.32	23.85	-	36.02	21.38																		33.61	35.07	1	35.44	-	1	1		33.61	35.07	1	35.44	-	1	1
33.89	35.82	24.82	35.07	33.55	19.84																							Similar	159		33	35.32	1	-	36.02	1	1
34.7	36	24.2	-	-	24.1																							Total	174		33.89	35.82	1	35.07	33.55	1	1
34.4	36.72	27.08	-	-	25.83																								0.913793		34.7	36	1	-	-	0	0
32.51	36.75	28.92	-	-	24.53																										34.4	36.72	1	-	-	0	0
36.47	36.75	26.3	-	-	28.27																										32.51	36.75	1	-	-	0	0
-	36.79	27.96	33.85	34.95	29.13																										36.47	36.75	1	-	-	0	0
36.82	36.92	31.1	-	-	22.59																										-	36.79	1	33.85	34.95	1	1
-	37.08	27.83	-	34.07	23.67																										36.82	36.92	1	-	-	0	0
35.44	37.08	26.07	36.05	-	25.62																										-	37.08	1	-	34.07	1	1
-	37.09	25.8	-	-	24.24																										35.44	37.08	1	36.05	-	1	1
-	37.1	25.6	-	-	26.8																										-	37.09	1	-	-	0	0
36.72	37.13	26.11	35.04	35.32	22.14																										-	37.1	1	-	-	0	0
34.52	37.2	27.94	-	-	25.2																										36.72	37.13	1	35.04	35.32	1	1
-	37.4	26.2	-	-	23.6																										34.52	37.2	1	-	-	0	0
36.7	37.48	22.37	-	-	20.95																										-	37.4	1	-	-	0	0
-	-	29.33	36.51	34.47	23.86																										36.7	37.48	1	-	-	0	0
-	-	25.97	33.28	32.3	25																										33.9	-	1	-	-	0	0
-	-	22.49	34.9	37.76	18.08																										36.6	-	1	35.42	36.05	1	1
-	-	28.75	30.51	32.73	22.89																										37.6	-	1	-	-	0	0
33.9	-	27.19	-	-	20.25																										36.33	-	1	-	-	0	0
36.6	-		35.42	36.05	22.57																										36.49	-	1	33.45	35.18	1	1
-	-	22.09	35.41	36.22	23.04																															Similar	167
37.6	-	25.8	-	-	23.4																															Total	195
-	-	26.9	36.7	-	25.2																																0.85641
36.33	-	26.72	-	-	22.37
-	-	22.63	-	37.09	20.57
-	-	26.08	-	37.36	25.7
-	-	25.4	35.51	35.17	26.3
-	-	24.7	-	36.9	23.8
-	-	27	36.63	34.33	25
-	-	24.6	-	34.78	22.9
-	-	24	-	35.42	28.9
36.49	-	28.5	33.45	35.18	21.2
-	-	23.8	34.72	35.35	26.8

## Sheet: Ct Grouping_UI
University of Indonesia					<20									<35									Sensitivity	CT Groups
NP N1	NP N2	Ga N1	Ga N2		NP N1	NP N2	Pos?	Ga N1	Ga N2	Pos?	Both?			NP N1	NP N2	Pos?	Ga N1	Ga N2	Pos?	Both?				<20	<30	<35	<40
14.23	15.01	21.49	24.26		14.23	15.01	1	21.49	24.26	1	1			14.23	15.01	1	21.49	24.26	1	1			RSDK, RSND	1	0.9796	0.9138	0.8564
16.86	17.62	19.79	21.8		16.86	17.62	1	19.79	21.8	1	1			16.86	17.62	1	19.79	21.8	1	1			UI	1	1	0.9412	0.85
16.82	18.13	30.05	31.72		16.82	18.13	1	30.05	31.72	1	1			16.82	18.13	1	30.05	31.72	1	1
18.54	19.82	22.31	25.1		18.54	19.82	1	22.31	25.1	1	1			18.54	19.82	1	22.31	25.1	1	1
19.34	20.09	29.99	32.29							Similar	4			19.34	20.09	1	29.99	32.29	1	1
18.54	20.17	18.96	20.43							Total	4			18.54	20.17	1	18.96	20.43	1	1
18.83	20.18	25.9	28.35								1			18.83	20.18	1	25.9	28.35	1	1
19.63	20.82	22.21	24.51											19.63	20.82	1	22.21	24.51	1	1
19.16	22.04	18.14	22.75		<30									19.16	22.04	1	18.14	22.75	1	1
20.68	22.04	25.06	27.33		NP N1	NP N2	Pos?	Ga N1	Ga N2	Pos?	Both?			20.68	22.04	1	25.06	27.33	1	1
25.12	25.88	32.4	34.71		14.23	15.01	1	21.49	24.26	1	1			25.12	25.88	1	32.4	34.71	1	1
25	26.03	20.31	22.56		16.86	17.62	1	19.79	21.8	1	1			25	26.03	1	20.31	22.56	1	1
34.78	26.18	32.31	25.67		16.82	18.13	1	30.05	31.72	1	1			34.78	26.18	1	32.31	25.67	1	1
26.26	29.16	21.93	24.43		18.54	19.82	1	22.31	25.1	1	1			26.26	29.16	1	21.93	24.43	1	1
32.82	35.03	20.03	22.52		19.34	20.09	1	29.99	32.29	1	1			32.82	35.03	1	20.03	22.52	1	1
33.25	36.34	-	-		18.54	20.17	1	18.96	20.43	1	1			33.25	36.34	1	-	-	0	0
33.01	36.55	36.61	38.37		18.83	20.18	1	25.9	28.35	1	1			33.01	36.55	1	36.61	38.37	1	1
36	37.44	34.26	36.59		19.63	20.82	1	22.21	24.51	1	1								Similar	16
36.35	37.48	-	-		19.16	22.04	1	18.14	22.75	1	1								Total	17
36.14	37.5	-	-		20.68	22.04	1	25.06	27.33	1	1									0.941176
					25.12	25.88	1	32.4	34.71	1	1
					25	26.03	1	20.31	22.56	1	1			<40
					34.78	26.18	1	32.31	25.67	1	1			NP N1	NP N2	Pos?	Ga N1	Ga N2	Pos?	Both?
					26.26	29.16	1	21.93	24.43	1	1			14.23	15.01	1	21.49	24.26	1	1
										Similar	14			16.86	17.62	1	19.79	21.8	1	1
										Total	14			16.82	18.13	1	30.05	31.72	1	1
											1			18.54	19.82	1	22.31	25.1	1	1
														19.34	20.09	1	29.99	32.29	1	1
														18.54	20.17	1	18.96	20.43	1	1
														18.83	20.18	1	25.9	28.35	1	1
														19.63	20.82	1	22.21	24.51	1	1
														19.16	22.04	1	18.14	22.75	1	1
														20.68	22.04	1	25.06	27.33	1	1
														25.12	25.88	1	32.4	34.71	1	1
														25	26.03	1	20.31	22.56	1	1
														34.78	26.18	1	32.31	25.67	1	1
														26.26	29.16	1	21.93	24.43	1	1
														32.82	35.03	1	20.03	22.52	1	1
														33.25	36.34	1	-	-	0	0
														33.01	36.55	1	36.61	38.37	1	1
														36	37.44	1	34.26	36.59	1	1
														36.35	37.48	1	-	-	0	0
														36.14	37.5	1	-	-	0	0
																			Similar	17
																			Total	20
																				0.85

## Sheet: deltaTest
Subject No	Age	Age Cat	Sex	Sex Cat	deltaTest	No of Symptoms	NP FAM	NP HEX	NP Cy5	Positive?	G FAM	G HEX	G Cy5	Positive?	Both		<3 days
C121058	49	3	W	0	0	7	26.38	28.86	30.77	1	30.49	32.27	25.35	1	1		NPOP	Gargle
G-777	27	1	M	1	0	0	13.54	15.17	23.39	1	29.28	31.63	27.46	1	1			Pos	Neg	Total
G-730	49	3	W	0	0	0	18.62	20.86	22.38	1	36.42	-	21.97	1	1		Pos	72	9	81
G-626	52	4	W	0	0	0	-	-	26.66	0	-	-	21.72	0	0		Neg	4	32	36
G-721	23	1	M	1	0	0	13.28	15.16	26.82	1	30.09	32.37	26.72	1	1		Total	76	41	117
C740899	30	1	M	1	1	2	34.57	34.6	28.84	1	-	-	20.43	0	0
C676995	26	1	M	1	1	4	-	-	29.96	0	-	-	28.88	0	0		Sensitivity	88.8889
C830957	27	1	W	0	1	4	20.36	21.26	26.57	1	28.7	29.33	19.74	1	1		Specificity	88.8889
C583838	31	2	M	1	1	3	-	-	26.46	0	-	-	21.94	0	0		NPV	78.0488
C798443	47	3	W	0	1	3	15.65	16.7	27.78	1	26.33	26.77	21.7	1	1		PPV	94.7368
C750918	33	2	M	1	1	6	18.89	19.96	30.23	1	24.48	25.43	21.72	1	1
C750407	26	1	M	1	1	4	14.79	15.51	25.36	1	24.59	25.35	19.85	1	1		3 to 5 days
C660265	31	2	W	0	1	6	16.95	17.72	27.03	1	26.37	25.78	20.69	1	1		NPOP	Gargle
C862086	14	0	W	0	1	2	-	-	22.49	0	34.9	37.76	18.08	1	0			Pos	Neg	Total
C861275	33	2	M	1	1	2	20.72	21.62	25.89	1	25.75	26.46	18.92	1	1		Pos	80	14	94
C845534	63	5	W	0	1	5	24.84	25.97	26.77	1	32.88	30.77	21.9	1	1		Neg	6	34	40
FND	32	2	W	0	1	1	-	-	28.76	0	-	-	27.67	0	0		Total	86	48	134
C662083	29	1	W	0	1	4	15.4	17.24	25	1	27.63	29.28	21.93	1	1
THW	28	1	M	1	1	9	14.92	16.75	28.72	1	26.73	28.38	20.42	1	1		Sensitivity	85.1064
C911365	33	2	W	0	1	8	18.44	20.6	29.92	1	34.6	34.31	24.97	1	1		Specificity	85
C899212	20	1	M	1	1	3	20.21	22.69	26.6	1	32.97	34.48	25.1	1	1		NPV	70.8333
C629145	39	2	M	1	1	5	19.2	20.9	26.19	1	32.45	32.36	24.14	1	1		PPV	93.0233
C660256	29	1	M	1	1	4	25.93	28.9	28.66	1	30.9	31.58	19.76	1	1
C718238	28	1	W	0	1	1	22.75	25.37	25.81	1	34.4	39.12	22.21	1	1		>5 days
C324222	55	4	W	0	1	2	14.78	16.99	30.92	1	22.99	23.74	23.97	1	1		NPOP	Gargle
MRW	41	3	W	0	1	4	16.31	18.8	23.65	1	30.86	32.91	30.02	1	1			Pos	Neg	Total
C525470	30	1	M	1	1	3	25.38	27.59	27.18	1	31.83	32.58	23.34	1	1		Pos	4	1	5
C859267	30	1	W	0	1	6	19.65	21.74	26.83	1	23.5	24.28	23.72	1	1		Neg	4	18	22
C610553	39	2	W	0	1	7	-	-	31.08	0	-	-	23.25	0	0		Total	8	19	27
C669980	47	3	W	0	1	2	28.75	29.42	28.59	1	-	-	25.72	0	0
C414669	34	2	W	0	1	2	14.63	14.6	26.91	1	24.61	23.81	27.91	1	1		Sensitivity	80
C481656	61	5	M	1	1	1	16.7	17.42	23.4	1	35.25	37.86	20.65	1	1		Specificity	81.8182
C850742	22	1	W	0	1	2	33.89	35.82	24.82	1	35.07	33.55	19.84	1	1		NPV	94.7368
G-101	39	2	M	1	1	0	-	-	25.16	0	-	-	22.67	0	0		PPV	50
G-192	61	5	M	1	1	0	-	-	24.44	0	-	-	22.13	0	0
G-103	20	1	M	1	1	2	17.25	19.04	24.08	1	32.66	34.04	24.7	1	1
G-123	60	4	W	0	1	1	16.65	18.41	21.24	1	27.33	30.04	21.25	1	1								Sensitivity	Days from Onset Symptom
G-146	31	2	W	0	1	0	31.86	33.89	21.4	1	-	-	21.53	0	0									<3	3 to 5	>5
G-169	26	1	W	0	1	1	20.25	21.68	22.49	1	35.84	36.35	22.26	1	1								Gargle	0.8889	0.8511	0.8
G-195	30	1	W	0	1	1	19.4	21.03	23.58	1	30.34	32.54	21.56	1	1
G-317	40	2	W	0	1	0	-	-	26.1	0	-	-	21.8	0	0
G-410	30	1	M	1	1	0	-	-	24.88	0	-	-	21.93	0	0
G-539	23	1	M	1	1	0	-	37.09	25.8	1	-	-	24.24	0	0
G-738	22	1	W	0	1	1	-	-	28.4	0	-	-	28.9	0	0
G-706	27	1	W	0	1	2	17.63	18.97	22.79	1	30.01	31.7	26.54	1	1
G-583	56	4	W	0	1	1	-	-	27.33	0	-	-	20.69	0	0
G-116	60	4	W	0	1	0	-	-	23.69	0	-	-	25.27	0	0
G-119	23	1	M	1	1	1	-	-	26.47	0	-	-	24.41	0	0
G-166	5	0	W	0	1	0	-	-	31.17	0	-	-	29.98	0	0
G-187	58	4	M	1	1	0	-	-	27.16	0	-	-	23.85	0	0
G-005	22	1	W	0	1	1	22.92	24.55	26.3	1	35.74	33.2	26.2	1	1
G-011	41	3	M	1	1	3	-	-	27	0	-	-	27.5	0	0
G-012	29	1	W	0	1	1	14.26	15.8	25.7	1	22.56	24.24	24.1	1	1
G-015	34	2	W	0	1	1	16.61	18.03	25.4	1	33.86	37.73	24.4	1	1
C693714	36	2	M	1	2	5	-	-	28.92	0	-	-	24.4	0	0
C242123	30	1	W	0	2	1	-	-	26.14	0	-	-	22.47	0	0
C537261	29	1	M	1	2	4	17.71	18.57	29.95	1	26.7	27.26	20.7	1	1
BS	53	4	M	1	2	3	15.46	16.29	25.71	1	16.32	16.63	19.57	1	1
C750404	26	1	W	0	2	3	16.68	17.48	27.96	1	18.77	18.36	21.25	1	1
C861668	30	1	M	1	2	4	20.98	21.95	27.23	1	30.53	32.38	19.86	1	1
C438761	29	1	W	0	2	4	22.47	23.36	26.43	1	29.38	29.92	20.97	1	1
C323911	32	2	W	0	2	1	-	-	27.38	0	-	-	22.61	0	0
AKF	30	1	W	0	2	4	-	-	25.35	0	-	-	23.51	0	0
ER	31	2	W	0	2	4	-	-	29.18	0	-	-	21.78	0	0
STO	38	2	M	1	2	4	24.81	25.46	25.81	1	33.76	32.1	20.4	1	1
C810214	23	1	W	0	2	7	14.8	15.69	25.12	1	31.54	30.74	23.83	1	1
NK	28	1	W	0	2	7	22.81	23.76	27.55	1	34.62	35.48	21.53	1	1
MW	32	2	W	0	2	2	23.25	23.99	28.33	1	31.8	32.58	20.87	1	1
MSN	32	2	W	0	2	2	-	-	24.7	0	-	-	21.98	0	0
JWT	38	2	W	0	2	1	23.9	24.62	28.4	1	27.33	27.91	22.79	1	1
C740697	27	1	W	0	2	2	25.49	25.64	27.17	1	-	-	21.69	0	0
C693815	34	2	M	1	2	2	-	-	30.59	0	-	-	23.46	0	0
C499097	32	2	M	1	2	5	22.29	22.51	29.94	1	25.45	25.92	20.19	1	1
C661175	24	1	W	0	2	3	17.67	19.54	29.81	1	32.51	33.31	23.43	1	1
FA	27	1	M	1	2	5	-	-	26.89	0	-	-	21.67	0	0
C565531	28	1	W	0	2	3	16.85	19.4	30.42	1	28.9	22.12	20.55	1	1
RI	24	1	M	1	2	1	24.44	26.91	30.75	1	29.93	31.72	25.28	1	1
ESH	37	2	W	0	2	1	-	-	28.75	0	30.51	32.73	22.89	1	0
C401155	47	3	W	0	2	2	21.62	23.91	27.97	1	34.81	35.34	22.46	1	1
C166638	40	2	W	0	2	4	15.93	18.16	25.42	1	21.4	21.37	17.68	1	1
C086946	38	2	W	0	2	5	17.93	20.52	28.49	1	26.76	28.63	24.31	1	1
C378220	30	1	W	0	2	4	22.98	25.5	27.17	1	33.99	36.43	26.84	1	1
C868152	25	1	W	0	2	3	27.45	30.46	29.56	1	31.49	32.52	20.19	1	1
C006453	19	1	M	1	2	2	23.85	26.91	30.18	1	31.23	31.75	24.18	1	1
C578746	51	4	M	1	2	2	26.34	28.83	26.49	1	32.83	34.75	21.09	1	1
C628335	39	2	W	0	2	7	18.54	20.94	28.87	1	27.89	25.92	20.19	1	1
C386681	30	1	W	0	2	2	16.58	18.7	31.81	1	33.47	33.39	21.13	1	1
C404021	55	4	W	0	2	1	30.93	33.94	26.62	1	-	-	21.95	0	0
C872022	82	5	M	1	2	1	27.63	27.73	27.41	1	37.74	33.77	23.71	1	1
C871995	46	3	M	1	2	2	34.6	33.31	29.31	1	35.69	37.76	20.67	1	1
C814857	30	1	M	1	2	2	32.45	32.51	24.37	1	37.3	33.55	23.27	1	1
C865823	29	1	W	0	2	4	16.94	17.67	22.6	1	25.75	25.44	24.41	1	1
C850399	64	5	W	0	2	6	19.71	21.35	3.81	1	30.94	31.47	23.9	1	1
C849449	32	2	W	0	2	3	-	-	25.97	0	33.28	32.3	25	1	0
C214035	72	5	W	0	2	3	21.38	22.47	25.57	1	30.31	31.63	23.33	1	1
C124311	70	5	M	1	2	4	19.63	21.89	28	1	23.92	23.76	28.74	1	1
B065366	65	5	W	0	2	4	31.36	33.56	25.86	1	-	-	21.75	0	0
C853541	37	2	W	0	2	2	-	-	23.64	0	-	-	20.31	0	0
C854992	65	5	W	0	2	2	-	-	23.56	0	-	-	20.02	0	0
C855182	35	2	W	0	2	4	16.64	18.46	23.98	1	28.27	28.98	22.92	1	1
A-017	42	3	W	0	2	3	36.7	37.48	22.37	1	-	-	20.95	0	0
G-120	45	3	M	1	2	0	31.9	32.94	25.98	1	-	-	22.45	0	0
G-145	32	2	M	1	2	1	19.39	20.47	23.87	1	23.01	25.47	23.8	1	1
G-109	38	2	W	0	2	1	19.6	22.3	28.5	1	26.4	28.4	24.6	1	1
G-151	38	2	W	0	2	7	14.5	16.7	27.3	1	16.5	18.1	24.7	1	1
G-131	25	1	W	0	2	0	-	-	28.3	0	-	-	22.7	0	0
G-349	55	4	M	1	2	1	-	-	24.9	0	-	-	23.9	0	0
G-500	34	2	M	1	2	6	27.3	27.7	26.4	1	23.8	26.5	25.1	1	1
G-330	22	1	W	0	2	3	18.3	20.5	27.1	1	30.4	32	25.2	1	1
G-454	25	1	W	0	2	4	18.07	19.18	22.93	1	30.07	31.2	21.29	1	1
G-417	14	0	M	1	2	4	22.12	23.5	23.02	1	31.93	33.73	25.07	1	1
G-337	48	3	M	1	2	6	21.58	22.51	24.28	1	25.54	26.58	20.35	1	1
G-421	22	1	W	0	2	2	-	-	23.5	0	-	-	22.33	0	0
G-607	28	1	W	0	2	0	-	-	25.8	0	-	-	27.7	0	0
G-678	28	1	M	1	2	1	-	-	23.8	0	-	-	22.1	0	0
G-619	32	2	W	0	2	3	-	-	23.78	0	-	-	21.04	0	0
G-002	30	1	M	1	2	0	-	-	25.4	0	35.51	35.17	26.3	1	0
C693800	32	2	M	1	3	2	-	-	29.44	0	-	-	23.54	0	0
C523456	29	1	W	0	3	3	-	-	27.2	0	-	-	22.37	0	0
C242123	51	4	W	0	3	2	-	-	27.78	0	-	-	21.29	0	0
C693687	31	2	M	1	3	6	17.34	18.77	26.91	1	31.38	30.55	20.97	1	1
SPA	34	2	M	1	3	6	15.58	16.47	29.35	1	18.96	19.69	19.77	1	1
DMS	30	1	W	0	3	2	22.56	23.43	27.95	1	32.97	32.83	21.58	1	1
B405344	38	2	W	0	3	1	-	-	28.83	0	-	-	19.92	0	0
C664522	34	2	W	0	3	3	-	-	28.74	0	-	-	22.42	0	0
SFY	23	1	W	0	3	2	-	-	28.45	0	-	-	24.87	0	0
C628384	29	1	W	0	3	2	-	-	28.69	0	-	-	22.82	0	0
C725280	57	4	M	1	3	6	23.96	25.76	21.69	1	35.91	33.4	23.34	1	1
C690256	30	1	W	0	3	3	17.64	19.47	26.65	1	31.82	32.15	20.78	1	1
C723256	32	2	M	1	3	5	16.77	19.35	31.44	1	24.89	26.87	25.27	1	1
C742502	23	1	M	1	3	5	15.99	18.13	28.96	1	31.89	31.7	21.5	1	1
C451706	28	1	M	1	3	5	23.13	25.71	30.32	1	31.69	31.79	26.54	1	1
C783022	27	1	W	0	3	5	-	36.79	27.96	1	33.85	34.95	29.13	1	1
C842336	25	1	M	1	3	5	21.33	34.61	27.77	1	-	-	23.63	0	0
C355267	30	1	W	0	3	4	18.39	20.5	27.8	1	30.53	30.13	29.04	1	1
Tita Hidayati Istiningsih	44	3	W	0	3	1	33.9	-	27.19	1	-	-	20.25	0	0
C628378	19	1	W	0	3	7	16.73	18.99	25.99	1	28.54	29.34	24.13	1	1
C520836	32	2	M	1	3	4	34.52	37.2	27.94	1	-	-	25.2	0	0
C486638	25	1	M	1	3	6	24.71	26.71	24.71	1	34.83	34.35	22.64	1	1
C481658	35	2	W	0	3	2	17.64	20.27	29.05	1	24.54	24.45	20.39	1	1
C848253	39	2	M	1	3	3	21.38	23.92	27.27	1	34.35	34.6	20.66	1	1
B288516	37	2	M	1	3	6	22.9	25.39	27.89	1	24.95	26.44	22.32	1	1
C608122	41	3	W	0	3	5	15.86	17.81	23.79	1	25.68	26.37	24.28	1	1
C668290	28	1	M	1	3	3	16.46	18.57	28.21	1	29.5	29.32	21.78	1	1
C782902	32	2	M	1	3	4	19.7	22.21	20.11	1	28.66	29.6	21.3	1	1
C591916	36	2	M	1	3	3	18.54	20.94	28.87	1	27.89	30.27	18.48	1	1
C846883	71	5	M	1	3	1	21.78	24.5	28.16	1	20.64	21.23	18.09	1	1
B018178	69	5	M	1	3	2	30.81	30.8	25.27	1	31.85	30.93	21.21	1	1
C566165	29	1	W	0	3	2	17.38	17.55	21.95	1	25.67	25.46	22.79	1	1
C874192	23	1	W	0	3	6	-	-	28.25	0	-	-	26.2	0	0
C386009	36	2	W	0	3	2	-	-	25.39	0	-	-	22.23	0	0
C874705	60	4	M	1	3	1	-	-	21.98	0	-	-	23.44	0	0
C076938	59	4	W	0	3	2	17.71	18.94	26.78	1	24.95	25.93	25.24	1	1
C831634	38	2	W	0	3	0	12.46	12.87	26.74	1	19.34	19.67	21.77	1	1
C850599	28	1	W	0	3	6	13.37	13.46	21.89	1	20.74	21.35	23.44	1	1
C851363	54	4	W	0	3	2	21.78	23.97	28.37	1	34.37	35.92	21.59	1	1
C854266	71	5	M	1	3	5	23.86	26.34	30.48	1	35.87	37.24	23.76	1	1
C854070	46	3	M	1	3	9	22.52	24.94	24.61	1	32.84	38.34	24.76	1	1
C854422	62	5	W	0	3	10	27.56	30.19	22.92	1	29.27	31.85	19.38	1	1
C851471	40	2	W	0	3	1	15.64	17.62	26.86	1	33.57	-	28.3	1	1
C304674	44	3	M	1	3	5	27.74	29.61	27.58	1	32.38	33.46	26.59	1	1
A-003	44	3	M	1	3	4	36.6	-		1	35.42	36.05	22.57	1	1
A-007	49	3	M	1	3	6	27.74	29.64	27.52	1	33.67	34.58	21.18	1	1
A-013	56	4	M	1	3	8	26.41	27.52	24.37	1	33.2	35.14	21.18	1	1
A-015	52	4	M	1	3	6	-	-	24.87	0	-	-	23.85	0	0
A-018	63	5	W	0	3	4	27.84	29.28	24.71	1	36.57	-	20.57	1	1
A-019	40	2	M	1	3	6	17.57	18.51	23.97	1	36.17	35.36	19.79	1	1
A-022	53	4	W	0	3	6	34.4	36.72	27.08	1	-	-	25.83	0	0
A-023	62	5	M	1	3	4	32.29	34.48	25.73	1	-	-	22.07	0	0
A-024	57	4	M	1	3	7	20.7	22.9	25.8	1	25.5	26.4	24.2	1	1
B-001	22	1	W	0	3	1	-	-	25.16	0	-	-	23.1	0	0
G-329	31	2	W	0	3	0	-	-	23.2	0	-	-	20.8	0	0
G-455	29	1	W	0	3	3	-	-	23.43	0	-	-	21.09	0	0
G-596	24	1	W	0	3	1	-	-	23.81	0	-	-	23.87	0	0
G-526	26	1	W	0	3	6	18.57	20.43	22.95	1	30.23	33.38	21.23	1	1
G-670	26	1	W	0	3	0	-	-	24	0	-	-	22.23	0	0
G-671	21	1	W	0	3	0	-	-	26.3	0	-	-	21.8	0	0
G-613	47	3	W	0	3	0	-	-	27.8	0	-	-	24.3	0	0
G-757	66	5	M	1	3	0	-	-	23.97	0	-	-	27.38	0	0
G-710	34	2	W	0	3	2	-	-	28.49	0	-	-	25.58	0	0
G-773	26	1	M	1	3	0	-	-	26.08	0	-	37.36	25.7	1	0
G-424	61	5	M	1	3	4	12.04	13.98	26.57	1	12.9	14.86	21.07	1	1
G-162	8	0	W	0	3	0	36.47	36.75	26.3	1	-	-	28.27	0	0
G-184	34	2	M	1	3	0	-	-	27.09	0	-	-	26.23	0	0
G-138	57	4	W	0	3	1	18.93	19.84	25.01	1	18.47	20.85	23.1	1	1
G-014	27	1	W	0	3	1	-	-	23.8	0	34.72	35.35	26.8	1	0
C664525	38	2	M	1	4	5	-	-	25.9	0	-	-	21.96	0	0
Fathendra Arifqi R	30	1	W	0	4	6	29.61	30.42	26.74	1	32.59	31.67	21.3	1	1
Eri Widi Haryani	55	4	W	0	4	3	19.44	19.93	24.72	1	30.72	30.65	21.85	1	1
C860462	19	1	M	1	4	3	-	-	25.58	0	-	-	20.49	0	0
C727768	47	3	M	1	4	4	19.54	21.58	29.14	1	32.98	32.93	27.46	1	1
C671095	28	1	W	0	4	2	29.81	34.95	29.49	1	-	-	22.16	0	0
Eliezer Iswara A.	32	2	M	1	4	8	18.2	20.1	28.88	1	30.8	30.47	21.81	1	1
C744295	27	1	W	0	4	2	14.34	16.24	25.83	1	28.13	27.98	23.57	1	1
C659677	31	2	W	0	4	6	26.57	28.97	26.77	1	-	-	20.78	0	0
C898338	41	3	W	0	4	6	32.51	36.75	28.92	1	-	-	24.53	0	0
C867874	50	3	W	0	4	2	23.63	25.8	26.95	1	32.33	32.7	19.83	1	1
C719835	28	1	W	0	4	4	25.58	27.76	27.98	1	32.94	39.26	20.93	1	1
C65938	29	1	W	0	4	6	24.48	27.18	29.34	1	30.75	31.22	25.74	1	1
C649481	27	1	W	0	4	7	21.58	23.49	27.1	1	32.74	32.73	20.16	1	1
C668352	29	1	M	1	4	2	-	-	20.65	0	-	-	20.58	0	0
C525483	31	2	M	1	4	2	36.82	36.92	31.1	1	-	-	22.59	0	0
C482262	33	2	M	1	4	2	26.69	28.76	27.19	1	29.67	29.54	23.45	1	1
C665454	27	1	M	1	4	2	14.7	17.15	29.65	1	27.4	27.44	21.27	1	1
C481625	30	1	W	0	4	3	25.16	27.92	28.06	1	32.85	32.79	21.25	1	1
C872011	62	5	W	0	4	3	29.87	30.88	24.7	1	-	-	20.88	0	0
C871995	46	3	W	0	4	4	14.36	13.91	24.22	1	25.97	25.29	23.55	1	1
C525452	30	1	M	1	4	4	15.68	16.34	26.48	1	33.83	31.88	24.33	1	1
C681871	40	2	M	1	4	4	16.51	16.98	23.32	1	21.61	20.86	23.69	1	1
C852242	28	1	M	1	4	5	21.46	22.58	21.46	1	27.28	28.73	28.54	1	1
C852161	54	4	W	0	4	2	16.41	18.49	29.09	1	22.52	24.92	22.47	1	1
C854095	29	1	M	1	4	6	-	-	29.19	0	-	-	25.23	0	0
C498381	60	4	W	0	4	8	29.92	32.32	25.85	1	-	-	23.44	0	0
C851377	36	2	W	0	4	0	29.79	30.78	28.13	1	35.76	-	27.16	1	1
C846273	56	4	W	0	4	3	-	-	27.88	0	-	-	22.99	0	0
C854992	74	5	W	0	4	2	19.53	21.45	27.2	1	30.51	30.89	25.93	1	1
C551166	36	2	M	1	4	4	17.78	19.55	26.9	1	24.79	25.7	25.25	1	1
A-001	65	5	W	0	4	6	28.17	30.15	23.85	1	36.52	35.96	23.04	1	1
A-002	60	5	M	1	4	7	33.61	35.07	25.1	1	35.44	-	23.2	1	1
A-004	39	2	M	1	4	3	25.95	28	23.41	1	-	35.83	18.74	1	1
A-005	44	3	W	0	4	4	-	37.08	27.83	1	-	34.07	23.67	1	1
A-006	40	2	M	1	4	7	21.67	23.68	26.22	1	35.36	35.18	22.33	1	1
A-009	60	4	W	0	4	5	33	35.32	23.85	1	-	36.02	21.38	1	1
A-012	26	1	W	0	4	6	33	33.68	26.61	1	33.22	33.11	20.69	1	1
A-014	27	1	W	0	4	6	-	-	22.09	0	35.41	36.22	23.04	1	0
A-020	24	1	W	0	4	5	29.69	31.51	24.88	1	-	-	23.75	0	0
A-025	63	5	M	1	4	9	27.09	28.37	27.88	1	26.65	28.93	21.76	1	1
A-026	54	4	W	0	4	6	29.75	30.83	26.01	1	29.66	30.99	25.47	1	1
G-110	32	2	W	0	4	0	-	-	26.8	0	-	-	23.5	0	0
G-384	25	1	W	0	4	1	-	-	26.8	0	-	-	23.4	0	0
G-463	24	1	W	0	4	0	36.33	-	26.72	1	-	-	22.37	0	0
G-729	55	4	M	1	4	5	14.81	16.48	24.64	1	22.56	24.92	22.5	1	1
G-540	69	5	M	1	4	0	-	-	29.8	0	-	-	23.7	0	0
G-565	30	1	W	0	4	2	-	-	25.3	0	-	-	24.5	0	0
G-628	33	2	W	0	4	2	-	-	27.06	0	-	-	20.3	0	0
C458228	83	5	M	1	5	5	33.84	34.51	24.15	1	30.84	30.53	23.75	1	1
C851260	23	1	W	0	5	2	-	-	29.33	0	36.51	34.47	23.86	1	0
C844490	51	4	W	0	5	2	14.3	15.86	27.22	1	25.26	25.72	22.07	1	1
A-008	44	3	W	0	5	7	28.6	29.5	28.17	1	24.5	27.66	22.37	1	1
A-010	59	4	W	0	5	6	25.17	26.91	25.21	1	35.35	33	22.13	1	1
A-011	52	4	W	0	5	4	32.07	33.92	25.54	1	35.19	34.25	21.58	1	1
A-021	59	4	W	0	5	8	24.79	25.58	24.11	1	28.67	30.72	21.15	1	1
G-129	41	3	M	1	5	3	27.7	30.5	28.4	1	31.1	32.8	22.9	1	1
G-150	23	1	M	1	5	2	-	-	26.7	0	-	-	24.6	0	0
G-197	33	2	W	0	5	6	-	-	26.9	0	36.7	-	25.2	1	0
G-407	35	2	M	1	5	6	18.9	21.2	24.3	1	26.8	28.8	23.8	1	1
G-599	23	1	W	0	5	1	-	-	22.46	0	-	-	24.25	0	0
G-695	29	1	M	1	5	4	-	-	22.63	0	-	37.09	20.57	1	0
G-593	27	1	W	0	5	7	15.64	17.49	23.03	1	22.79	24.83	28.54	1	1
G-182	22	1	M	1	5	0	-	-	26.53	0	-	-	22.41	0	0
A-016	64	5	W	0	6	7	36.72	37.13	26.11	1	35.04	35.32	22.14	1	1
G-196	26	1	W	0	6	3	-	-	30.3	0	-	-	27.3	0	0
G-177	25	1	W	0	6	0	-	-	28.8	0	-	-	25.4	0	0
G-309	42	3	W	0	6	1	-	-	26	0	-	-	28.68	0	0
G-405	81	5	M	1	6	4	14.2	16.1	21.6	1	26.4	30.7	21.1	1	1
G-449	7	0	M	1	6	3	18.9	21	23	1	29.3	30.8	28.2	1	1
G-524	27	1	W	0	6	1	-	-	22.82	0	-	-	25.85	0	0
G-786	38	2	W	0	6	0	-	-	26.2	0	-	-	24.5	0	0
G-752	42	3	W	0	6	0	-	-	29.1	0	-	-	23.3	0	0
G-003	35	2	W	0	6	0	-	-	30.5	0	-	-	28.3	0	0
G-004	25	1	W	0	6	1	-	-	24.7	0	-	36.9	23.8	1	0
G-112	23	1	W	0	7	0	-	-	29.6	0	-	-	25.6	0	0
G-362	27	1	W	0	7	1	-	-	26.82	0	-	-	23.85	0	0
G-600	24	1	W	0	7	2	-	-	23.68	0	-	-	21.45	0	0
G-792	36	2	W	0	7	0	-	-	27.6	0	-	-	23.4	0	0
G-006	29	1	M	1	7	0	-	-	28.6	0	-	-	27.8	0	0
G-007	36	2	M	1	7	0	-	-	27	0	36.63	34.33	25	1	0
G-010	29	1	M	1	7	3	-	-	24	0	-	35.42	28.9	1	0
G-400	30	1	W	0	8	0	-	37.4	26.2	1	-	-	23.6	0	0
C853860	26	1	M	1	9	0	-	-	28.74	0	-	-	23.56	0	0
G-429	31	2	W	0	9	0	-	-	26.6	0	-	-	24.9	0	0
G-355	32	2	W	0	9	3	26.9	29.3	27	1	30.5	32.8	24.2	1	1
G-576	31	2	W	0	9	0	-	-	22.48	0	-	-	24.31	0	0
C854025	25	1	M	1	10	7	-	-	22.39	0	-	-	26.35	0	0
G-008	42	3	W	0	12	0	-	-	24.6	0	-	34.78	22.9	1	0
G-371	31	2	W	0	14	1	-	-	27.53	0	-	-	21.82	0	0
G-353	30	1	W	0	35	0	-	-	26.2	0	-	-	23.4	0	0
B-002	22	1	W	0		0	-	-	25.48	0	-	-	20.95	0	0
B-003	22	1	W	0		0	-	-	26.64	0	-	-	25.61	0	0
B-004	21	1	W	0		0	-	-	27.18	0	-	-	21.18	0	0
B-005	34	2	M	1		0	-	-	23.25	0	-	-	20.59	0	0
B-006	28	1	M	1		0	-	-	25.6	0	-	-	21.21	0	0
B-007	24	1	M	1		0	-	-	20.92	0	-	-	20.33	0	0
B-008	24	1	M	1		0	-	-	22.98	0	-	-	18.96	0	0
B-009	32	2	W	0		0	-	-	25.2	0	-	-	25.78	0	0
G-106	45	3	M	1		3	17.3	18.6	26.6	1	22.3	24.05	24.24	1	1
G-125	39	2	M	1		3	37.6	-	25.8	1	-	-	23.4	0	0
G-149	59	4	W	0		7	19.3	20.8	24.2	1	28.94	30.9	23.84	1	1
G-170	30	1	M	1		2	17.7	20.2	23.9	1	32.82	35.96	21.23	1	1
G-174	33	2	W	0		0	-	-	28.5	0	-	-	23.3	0	0
G-130	12	0	W	0		3	34.7	36.0	24.2	1	-	-	24.1	0	0
G-155	29	1	M	1		0	-	-	25.3	0	-	-	24.5	0	0
G-178	6	0	M	1		3	31.5	32.6	24.0	1	-	-	24.9	0	0
G-133	43	3	M	1		4	30.4	32.6	28.5	1	29.5	31.0	23.2	1	1
G-160	41	3	M	1		5	21.4	23.6	29.8	1	27.2	29.4	27.5	1	1
G-307	29	1	M	1		0	-	-	27.4	0	-	-	25.65	0	0
G-427	20	1	W	0		0	-	-	26.2	0	-	-	25.9	0	0
G-476	33	2	W	0		0	-	37.1	25.6	1	-	-	26.8	0	0
G-481	21	1	W	0		0	-	-	26.5	0	-	-	22.9	0	0
G-354	24	1	W	0		0	-	-	25.6	0	-	-	22	0	0
G-445	66	5	M	1		0	-	-	27	0	-	-	21.1	0	0
G-496	60	4	W	0		0	14.6	17.1	23.6	1	26.2	29.3	20.3	1	1
G-107	41	3	M	1		7	18.4	22.4	28.3	1	24.3	26.7	21.6	1	1
G-334	46	3	W	0		4	17.57	18.79	22.8	1	26.71	27.91	20.87	1	1
G-376	28	1	M	1		0	19.75	20.73	23.08	1	30.86	31.79	20.25	1	1
G-666	26	1	M	1		4	-	-	22.57	0	-	-	24.86	0	0
G-779	27	1	W	0		0	-	-	25.07	0	-	-	21.48	0	0
G-616	25	1	W	0		6	15.45	17.04	21.53	1	22.02	23.92	26.37	1	1
G-871	22	1	W	0		0	35.44	37.08	26.07	1	36.05	-	25.62	1	1
G-013	49	3	W	0		0	36.49	-	28.5	1	33.45	35.18	21.2	1	1
